# Supplementary material for: Visible light-induced mono-bromination of arenes with BrCCl3
Source: Royal Society of Chemistry journal article supplement (doi:10.1039/d1cc01721g), 2021-01-01
Supplement: d1cc01721g1.pdf [file d1cc01721g1.pdf]

## Supporting Information

### Visible-light-induced mono-bromination of arenes with BrCCl<sub>3</sub>

Jiali Fan,<sup>a</sup> Qiancheng wei,<sup>a</sup> Ershu Zhu,<sup>a</sup> Jing gao,<sup>a</sup> Xiamin Cheng,<sup>a\*</sup> Yongna Lu,<sup>a\*</sup> and  
Teck-peng Loh<sup>ab\*</sup>

<sup>a</sup>Institute of Advanced Synthesis, School of Chemistry and Molecular Engineering, Jiangsu National Synergetic Innovation Center for Advanced Materials, Nanjing Tech University (Nanjing Tech), Nanjing 211816, P. R. China.

<sup>b</sup>Division of Chemistry and Biological Chemistry, School of Physical and Mathematical Sciences, Nanyang Technological University, Singapore 637371 Singapore.

### List of Contents

|                                                     |     |
|-----------------------------------------------------|-----|
| 1. General information .....                        | S2  |
| 2. Mechanistic Studies.....                         | S2  |
| 3. General procedure for bromination of arenes..... | S4  |
| 4. NMR spectra.....                                 | S9  |
| 5. References.....                                  | S33 |

---

## 1. General information

All commercially available reagents were obtained from chemical suppliers and used without further purification. Flash column chromatography was performed on silica gel (300-400 mesh) with the indicated solvent mixtures. TLC analysis was performed on pre-coated, glass-backed silica gel plates and visualized with UV lamp (254 nm).

The  $^1\text{H}$  NMR spectra were recorded on 400 MHz spectrometers and  $^{13}\text{C}$  NMR spectra were recorded on 101 MHz spectrometers. Chemical shifts ( $\delta$ ) were reported as parts per million (ppm) downfield from tetramethylsilane and the following abbreviations were used to identify the multiplicities: s = singlet, d = doublet, t = triplet, q = quartet, m = multiplet, br = broad and all combinations thereof can be explained by their integral parts. High-resolution mass spectra (HRMS) were recorded on an Agilent Mass spectrometer using ESI-TOF (electrospray ionization-time of flight).

## 2. Mechanistic Studies

### 1) Ultraviolet-visible Absorption Experiments

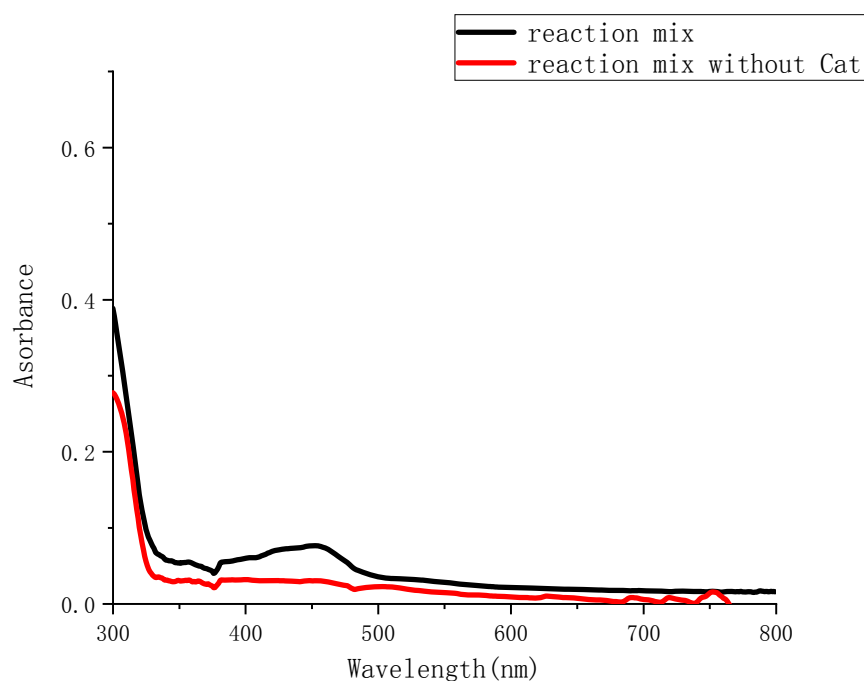

Figure S1: Ultraviolet-visible Absorption Analysis.

## 2) Stern-Volmer Fluorescent Quenching Experiments

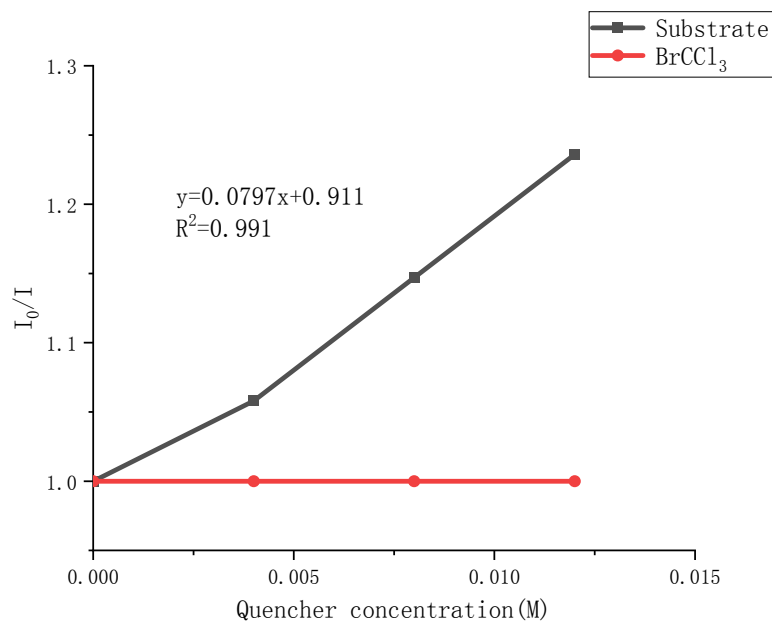

Figure S2: Stern-Volmer Fluorescent Quenching Analysis.

## 3) Electron Paramagnetic Resonance (EPR) Experiments

EPR measurements were recorded on a Bruker A200-6/1 CW-EPR spectrometer operating in X-band. After the reaction was stirred at room temperature under 23 W CFL for 30 min, DMPO (45  $\mu$ L) was added. After 10 min, a certain amount of sample was sealed in melting-point capillary and submitted for the EPR experiments. For the experiment without DMPO, the reaction mixture was submitted directly in melting-point capillary for EPR experiment. (DMPO = 5,5-dimethyl-1-pyrroline-1-oxide)

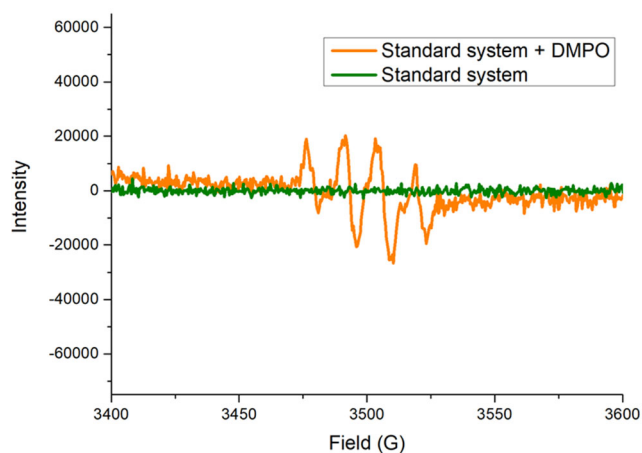

Figure S3: EPR spectra

### 3. General procedure for bromination of arenes

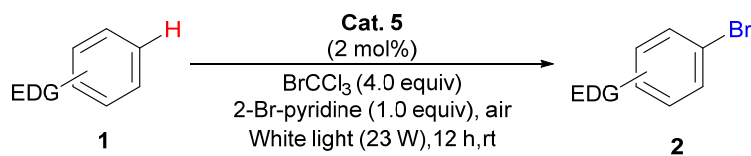

In the air, to an 8 mL vial equipped with a magnetic stir bar, were added **Cat. 5** ( $\text{Ru}(\text{bpy})_3\text{Cl}_2 \cdot 6\text{H}_2\text{O}$ ) (3.0 mg, 2.0 mol%), 2-Br-pyridine (31 mg, 0.20 mmol, 1.0 equiv.),  $\text{BrCCl}_3$  (158 mg, 0.80 mmol, 4.0 equiv.), substrate (0.20 mmol) and *N,N*-dimethylformamide (DMF, 1 mL). The reaction was then placed in the photoreactor and stirred at room temperature for 12 h. The mixture was proportioned with water (5 mL) and extracted by EtOAc (5 mL  $\times$  3). The combined organic layer were dried over anhydrous  $\text{Na}_2\text{SO}_4$  and concentrated *in vacuo*. The resulted residue was purified by column chromatography on silica gel, eluted with the mixture of ethyl acetate/hexanes, to give the corresponding products.

**2a** **4-Bromo-*N,N*-dimethylaniline (2a)**<sup>[1]</sup> Yellow oil (31.6 mg, 85%).  $^1\text{H NMR}$  (400 MHz, Chloroform-*d*)  $\delta$  7.26 (d,  $J = 8.0$  Hz, 2H), 6.49 (d,  $J = 8.3$  Hz, 2H), 2.81 (s, 3H).  $^{13}\text{C NMR}$  (101 MHz, Chloroform-*d*)  $\delta$  148.39, 132.00, 114.07, 108.94, 30.85.

**2b** **4-Bromo-*N,N*-dimethylaniline (2b)**<sup>[2]</sup> Light yellow oil (31.2 mg, 78%).  $^1\text{H NMR}$  (400 MHz, Chloroform-*d*)  $\delta$  7.30 (d,  $J = 9.1$  Hz, 2H), 6.59 (d,  $J = 9.1$  Hz, 2H), 2.92 (s, 6H).  $^{13}\text{C NMR}$  (101 MHz, Chloroform-*d*)  $\delta$  149.64, 131.82, 114.23, 108.64, 40.72.

**2c** **4-Bromo-*N,N*-diethylaniline (2c)**<sup>[3]</sup> Light yellow oil (36.9 mg, 81%).  $^1\text{H NMR}$  (400 MHz, Chloroform-*d*)  $\delta$  7.27 (d,  $J = 8.2$  Hz, 2H), 6.56 (d,  $J = 8.2$  Hz, 2H), 3.32 (q,  $J = 7.1$  Hz, 4H), 1.14 (t,  $J = 7.1$  Hz, 6H).  $^{13}\text{C NMR}$  (101 MHz, Chloroform-*d*)  $\delta$  146.79, 131.97, 113.48, 107.03, 44.58, 12.51.

**2d** **4-Bromo-*N,N*-diisopropylaniline (2d)**<sup>[4]</sup> Light yellow oil (38.4 mg, 75%).  $^1\text{H NMR}$  (400 MHz, Chloroform-*d*)  $\delta$  7.26 (d,  $J = 8.9$  Hz, 1H), 6.74 (d,  $J = 8.9$  Hz,

2H), 3.78 – 3.68 (m, 2H), 1.20 (d,  $J = 6.8$  Hz, 12H).  $^{13}\text{C}$  NMR (101 MHz, Chloroform- $d$ )  $\delta$  147.18, 131.32, 120.35, 109.99, 47.71, 21.32.

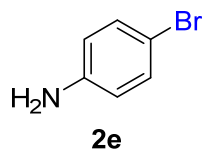

**4-Bromoaniline (2e)**<sup>[1]</sup> Yellow oil (15.5 mg, 44%).  $^1\text{H}$  NMR (400 MHz, Chloroform- $d$ )  $\delta$  7.23 (d,  $J = 8.8$  Hz, 2H), 6.56 (d,  $J = 8.8$  Hz, 2H), 3.60 (br, 2H).  $^{13}\text{C}$  NMR (101 MHz, Chloroform- $d$ )  $\delta$  145.50, 132.15, 116.85, 110.37.

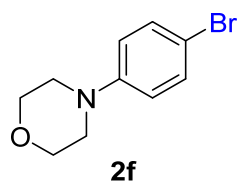

**4-(4-Bromophenyl)morpholine (2f)**<sup>[5]</sup> White solid (25.0 mg, 52%).  $^1\text{H}$  NMR (400 MHz, Chloroform- $d$ )  $\delta$  7.36 (d,  $J = 9.1$  Hz, 2H), 6.78 (d,  $J = 9.1$  Hz, 2H), 3.85 (t,  $J = 4.9$  Hz, 4H), 3.12 (t,  $J = 4.9$  Hz, 4H).  $^{13}\text{C}$  NMR (101 MHz, Chloroform- $d$ )  $\delta$  150.40, 132.06, 117.42, 112.31, 66.87, 49.26.

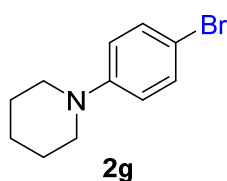

**1-(4-Bromophenyl)piperidine (2g)**<sup>[1]</sup> Colorless oil (45.1 mg, 94%).  $^1\text{H}$  NMR (400 MHz, Chloroform- $d$ )  $\delta$  7.31 (d,  $J = 9.1$  Hz, 2H), 6.79 (d,  $J = 9.0$  Hz, 2H), 3.12 (t,  $J = 5.5$  Hz, 4H), 1.72 – 1.66 (m, 4H), 1.60 – 1.54 (m, 2H).  $^{13}\text{C}$  NMR (101 MHz, Chloroform- $d$ )  $\delta$  151.30, 131.87, 118.15, 111.23, 50.59, 25.79,

24.31.

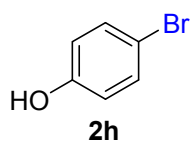

**4-Bromophenol (2h)**<sup>[2]</sup> Brown solid (24.6 mg, 71%).  $^1\text{H}$  NMR (400 MHz, Chloroform- $d$ )  $\delta$  7.33 (d,  $J = 8.9$  Hz, 2H), 6.72 (d,  $J = 8.9$  Hz, 2H), 4.92 (s, 1H).  $^{13}\text{C}$  NMR (101 MHz, Chloroform- $d$ )  $\delta$  154.82, 132.59, 117.32, 112.92.

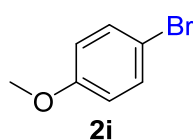

**1-Bromo-4-methoxybenzene (2i)**<sup>[5]</sup> Light yellow oil (34.4 mg, 92%).  $^1\text{H}$  NMR (400 MHz, Chloroform- $d$ )  $\delta$  7.38 (d,  $J = 9.1$  Hz, 2H), 6.78 (d,  $J = 9.1$  Hz, 2H), 3.78 (s, 3H).  $^{13}\text{C}$  NMR (101 MHz, Chloroform- $d$ )  $\delta$  158.78, 132.36, 115.83,

112.92, 55.57.

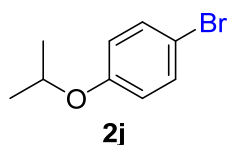

**1-Bromo-4-isopropoxybenzene (2j)**<sup>[5]</sup> Colorless oil (35.8 mg, 83%).  $^1\text{H}$  NMR (400 MHz, Chloroform- $d$ )  $\delta$  7.35 (d,  $J = 9.0$  Hz, 2H), 6.76 (d,  $J = 9.0$  Hz,

2H), 4.54 – 4.45 (m, 1H), 1.32 (d,  $J = 6.1$  Hz, 6H).  $^{13}\text{C}$  NMR (101 MHz, Chloroform- $d$ )  $\delta$  157.12, 132.39, 117.82, 112.67, 70.39, 22.06.

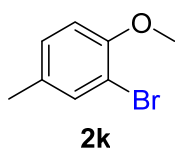

**2-Bromo-1-methoxy-4-methylbenzene (2k)**<sup>[3]</sup> Colorless oil (32.2 mg, 80%).  $^1\text{H}$  NMR (400 MHz, Chloroform- $d$ )  $\delta$  7.36 (d,  $J = 2.1$  Hz, 1H), 7.06 (dd,  $J = 8.3, 2.1$  Hz, 1H), 6.79 (d,  $J = 8.3$  Hz, 1H), 3.87 (s, 3H), 2.27 (s, 3H).  $^{13}\text{C}$  NMR (101 MHz, Chloroform- $d$ )  $\delta$  153.79, 133.86, 131.55, 129.00, 111.88, 111.32, 56.39, 20.29.

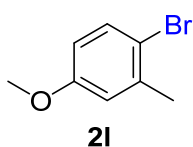

**1-Bromo-4-methoxy-2-methylbenzene (2l)**<sup>[5]</sup> Colorless oil (30.5 mg, 76%).  $^1\text{H}$  NMR (400 MHz, Chloroform- $d$ )  $\delta$  7.40 (d,  $J = 8.7$  Hz, 1H), 6.79 (d,  $J = 3.0$  Hz, 1H), 6.61 (dd,  $J = 8.7, 3.0$  Hz, 1H), 3.77 (s, 3H), 2.36 (s, 3H).  $^{13}\text{C}$  NMR (101 MHz, Chloroform- $d$ )  $\delta$  158.84, 138.89, 132.88, 116.56, 115.48, 112.99, 55.48, 23.27.

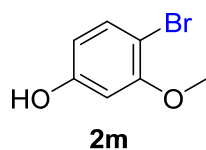

**4-Bromo-3-methoxyphenol (2m)**<sup>[6]</sup> Colorless oil (28.8 mg, 71%).  $^1\text{H}$  NMR (400 MHz, Chloroform- $d$ )  $\delta$  7.34 (d,  $J = 8.5$  Hz, 1H), 6.45 (d,  $J = 2.7$  Hz, 1H), 6.33 (dd,  $J = 8.5, 2.7$  Hz, 1H), 4.99 (s, 1H), 3.85 (s, 3H).  $^{13}\text{C}$  NMR (101 MHz, Chloroform- $d$ )  $\delta$  156.83, 156.26, 133.45, 108.62, 102.32, 100.56, 56.30.

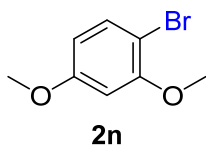

**1-Bromo-2,4-dimethoxybenzene (2n)**<sup>[5]</sup> Colorless oil (29.0 mg, 67%).  $^1\text{H}$  NMR (400MHz, Chloroform- $d$ )  $\delta$  7.40 (d,  $J = 8.7$  Hz, 1H), 6.49 (d,  $J = 2.7$  Hz, 1H), 6.40 (dd,  $J = 8.7, 2.7$  Hz, 1H), 3.87 (s, 3H), 3.79 (s, 3H).  $^{13}\text{C}$  NMR (101 MHz, Chloroform- $d$ )  $\delta$  160.34, 156.64, 133.26, 105.99, 102.54, 100.07, 56.25, 55.68.

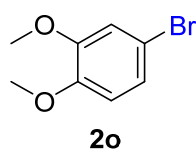

**4-Bromo-1,2-dimethoxybenzene (2o)**<sup>[5]</sup> Colorless oil (35.6 mg, 82%).  $^1\text{H}$  NMR (400 MHz, Chloroform- $d$ )  $\delta$  7.03 (dd,  $J = 8.6, 2.4$  Hz, 1H), 6.98 (d,  $J = 2.5$  Hz, 1H), 6.74 (d,  $J = 8.6$  Hz, 1H), 3.87 (s, 3H), 3.86 (s, 3H).  $^{13}\text{C}$  NMR (101 MHz, Chloroform- $d$ )  $\delta$  149.76, 148.36, 123.46, 114.76, 112.79, 112.45, 56.19, 56.13.

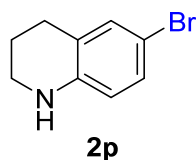

**6-Bromo-1,2,3,4-tetrahydroquinoline (2p)**<sup>[7]</sup> Colorless oil (29.8 mg, 71%). <sup>1</sup>H NMR (400 MHz, Chloroform-*d*)  $\delta$  7.05 – 7.01 (m, 2H), 6.35 (d, *J* = 8.3 Hz, 1H), 3.28 (t, *J* = 5.5 Hz, 2H), 2.73 (t, *J* = 6.4 Hz, 2H), 1.94 – 1.88 (m, 2H). <sup>13</sup>C NMR (101 MHz, Chloroform-*d*)  $\delta$  143.72, 132.02, 129.50, 123.61, 115.73, 108.46, 41.93, 26.94, 21.79.

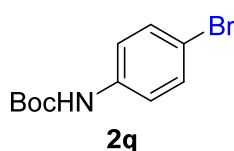

**tert-Butyl (4-bromophenyl)carbamate (2q)**<sup>[5]</sup> White solid (44.6 mg, 82%). <sup>1</sup>H NMR (400 MHz, Chloroform-*d*)  $\delta$  7.38 (d, *J* = 8.9 Hz, 2H), 7.25 (d, *J* = 8.8 Hz, 2H), 6.51 (s, 1H), 1.51 (s, 9H). <sup>13</sup>C NMR (101 MHz, Chloroform-*d*)  $\delta$  152.63, 137.56, 131.98, 115.52, 81.02, 28.42.

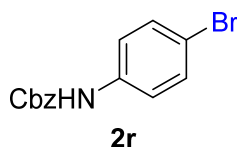

**Benzyl (4-bromophenyl)carbamate (2r)**<sup>[8]</sup> White solid (52.1 mg, 85%). <sup>1</sup>H NMR (400 MHz, Chloroform-*d*)  $\delta$  7.42 – 7.35 (m, 7H), 7.27 – 7.29 (m, 2H), 6.78 (s, 1H), 5.19 (s, 2H). <sup>13</sup>C NMR (101 MHz, Chloroform-*d*) 153.41, 136.95, 135.79, 131.90, 128.63, 128.43, 128.27, 120.27, 115.98, 67.16.

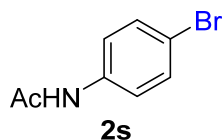

**N-(4-Bromophenyl)acetamide (2s)**<sup>[5]</sup> White solid (21.8 mg, 51%) <sup>1</sup>H NMR (400 MHz, DMSO-*d*<sub>6</sub>)  $\delta$  10.06 (s, 1H), 7.54 (d, *J* = 8.9 Hz, 2H), 7.44 (d, *J* = 8.9 Hz, 2H), 2.02 (s, 3H). <sup>13</sup>C NMR (101 MHz, DMSO-*d*<sub>6</sub>)  $\delta$  168.50, 138.71, 131.51, 120.86, 114.51, 24.07.

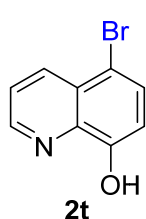

**5-Bromoquinolin-8-ol (2t)** White solid (33.5 mg, 75%). <sup>1</sup>H NMR (400 MHz, DMSO-*d*<sub>6</sub>)  $\delta$  10.85 (s, 1H), 8.87 (dd, *J* = 4.3, 1.7 Hz, 2H), 8.27 (dd, *J* = 8.2, 1.7 Hz, 1H), 7.83 (d, *J* = 8.9 Hz, 1H), 7.38 (dd, *J* = 8.1, 4.3 Hz, 1H), 7.34 (d, *J* = 8.9 Hz, 1H). <sup>13</sup>C NMR (101 MHz, DMSO-*d*<sub>6</sub>)  $\delta$  155.79, 151.25, 146.20, 136.38, 128.42, 123.36, 119.24, 118.90, 106.41. HRMS (ESI) *calcd* for C<sub>9</sub>H<sub>6</sub>BrNO [M + H]<sup>+</sup> 223.9711, found 223.9707.

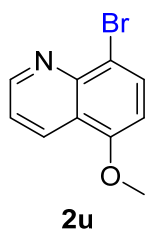

**8-Bromo-5-methoxyquinoline (2u)** Colorless oil (19.3 mg, 41%). <sup>1</sup>H NMR (400 MHz, Chloroform-*d*)  $\delta$  9.05 (dd, *J* = 4.3, 1.7 Hz, 1H), 8.60 (dd, *J* = 8.4, 1.7 Hz, 3H), 7.93 (d, *J* = 8.3 Hz, 1H), 7.45 (dd, *J* = 8.4, 4.3 Hz, 1H), 6.75 (d, *J* = 8.3 Hz, 1H), 4.00 (s, 3H).

$^{13}\text{C}$  NMR (101 MHz, Chloroform-*d*)  $\delta$  155.15, 151.60, 145.64, 132.72, 131.61, 122.32, 121.11, 114.92, 105.20, 56.10. HRMS (ESI) *calcd* for  $\text{C}_{10}\text{H}_8\text{BrNO}$   $[\text{M}]^+$  236.9789, found 236.9791.

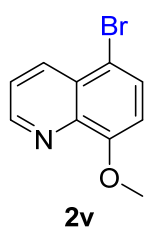

**5-Bromo-8-methoxyquinoline (2v)**<sup>[9]</sup> Colorless oil (30.7 mg, 65%).  $^1\text{H}$  NMR (400 MHz, Chloroform-*d*)  $\delta$  8.95 (dd,  $J = 4.2, 1.6$  Hz, 1H), 8.50 (dd,  $J = 8.6, 1.6$  Hz, 1H), 7.73 (d,  $J = 8.4$  Hz, 1H), 7.55 (dd,  $J = 8.5, 4.2$  Hz, 1H), 6.94 (d,  $J = 8.4$  Hz, 1H), 4.09 (s, 3H).  $^{13}\text{C}$  NMR (101 MHz, Chloroform-*d*)  $\delta$  155.35, 149.88, 140.94, 135.76, 130.23, 128.34, 122.93, 112.02, 108.29, 56.33.

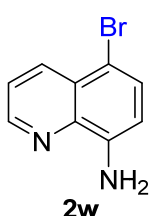

**5-Bromoquinolin-8-amine (2w)**<sup>[10]</sup> Yellow solid (14.3 mg, 32%).  $^1\text{H}$  NMR (400 MHz, Chloroform-*d*)  $\delta$  8.81 (dd,  $J = 4.2, 1.5$  Hz, 1H), 8.49 (dd,  $J = 8.6, 1.5$  Hz, 1H), 7.71 (d,  $J = 8.2$  Hz, 1H), 7.57 (dd,  $J = 8.5, 4.2$  Hz, 1H), 7.08 (d,  $J = 8.2$  Hz, 1H).  $^{13}\text{C}$  NMR (101 MHz, Chloroform-*d*)  $\delta$  152.13, 148.52, 139.02, 136.03, 131.21, 127.72, 123.09, 110.81, 109.91.

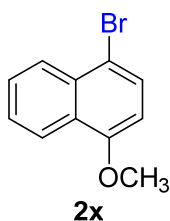

**1-Bromo-4-methoxynaphthalene (2x)**<sup>[5]</sup> Colorless liquid (10.9 mg, 23%, 65% (Conversion yield)).  $^1\text{H}$  NMR (400 MHz, Chloroform-*d*)  $\delta$  8.33 (d,  $J = 8.4$  Hz, 1H), 8.24 (d,  $J = 8.4$  Hz, 1H), 7.71 – 7.61 (m, 2H), 7.57 (t,  $J = 7.5$  Hz, 1H), 6.68 – 6.55 (m, 1H), 3.95 (s, 3H).  $^{13}\text{C}$  NMR (101 MHz, Chloroform-*d*)  $\delta$  155.19, 132.39, 129.50, 127.79, 126.85, 126.77, 125.97, 122.47, 113.22, 104.48, 55.63.



## 4. NMR spectra

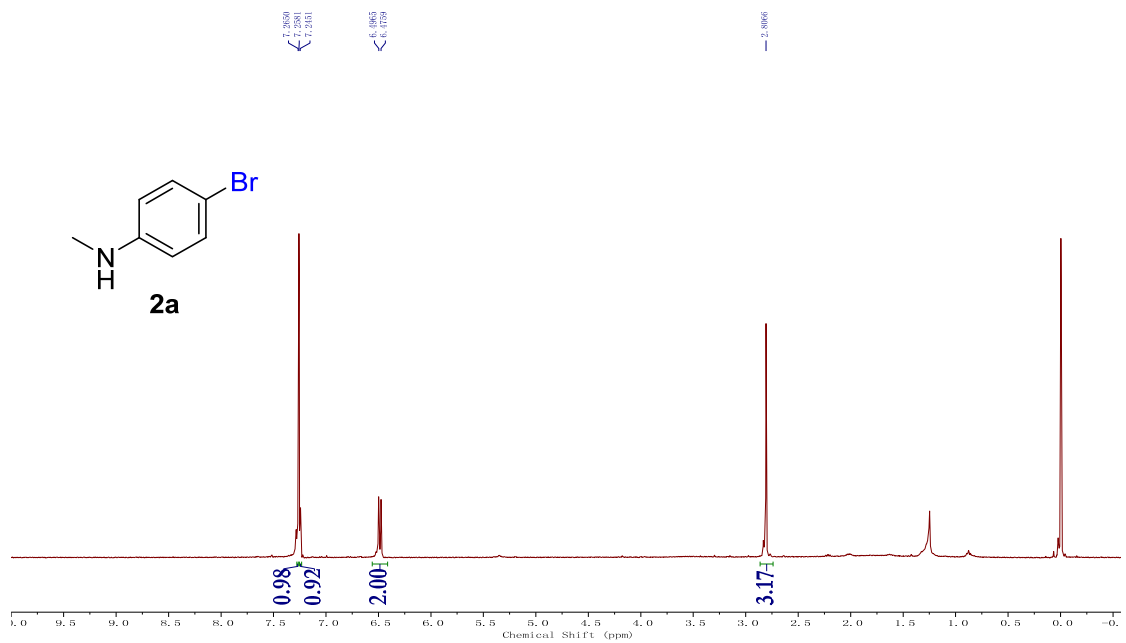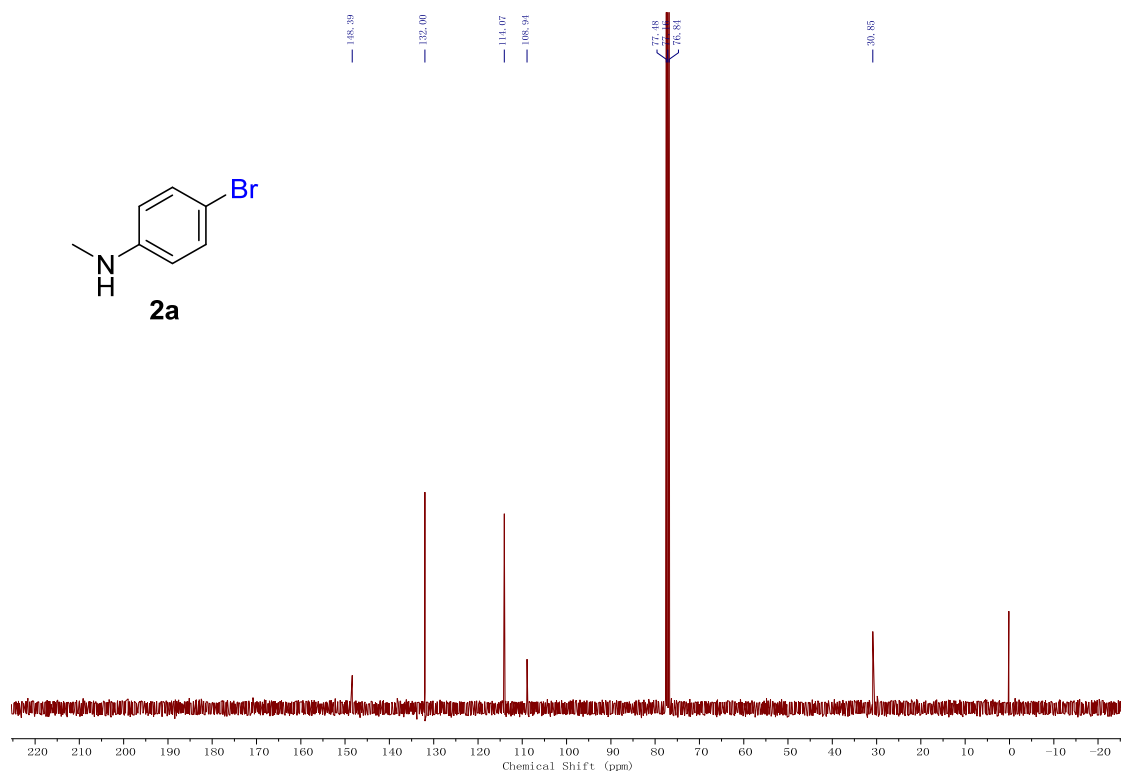

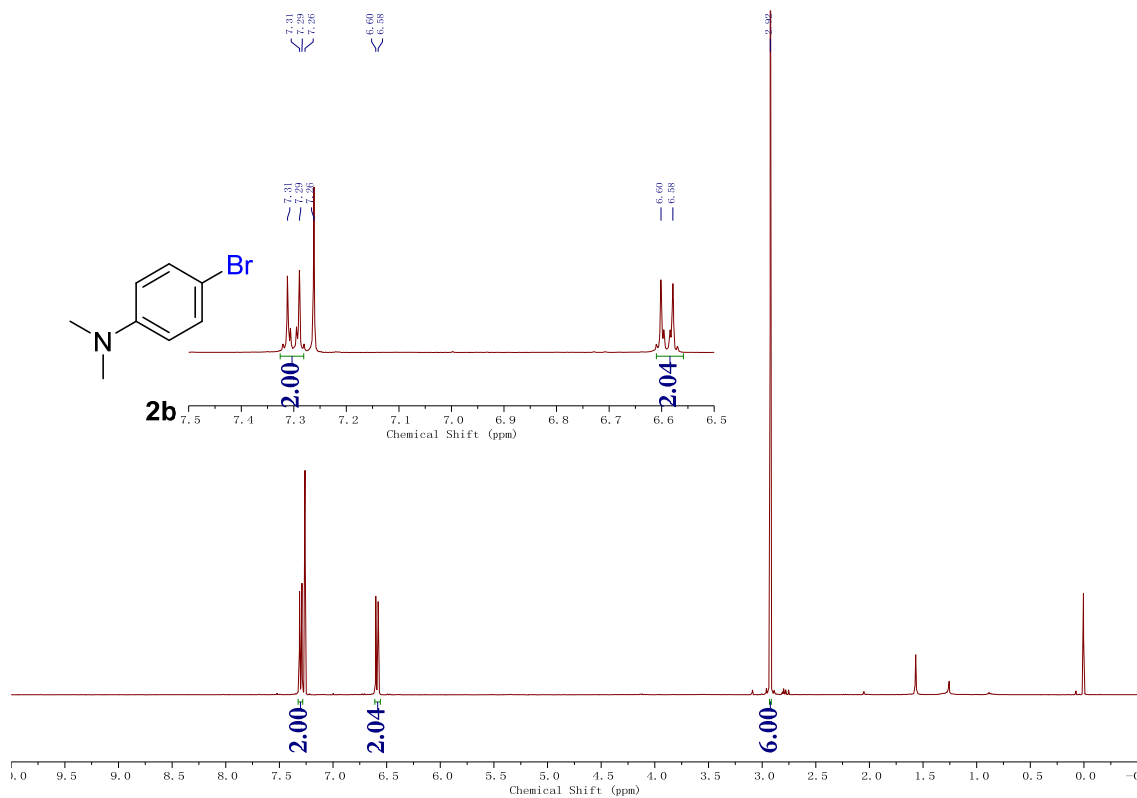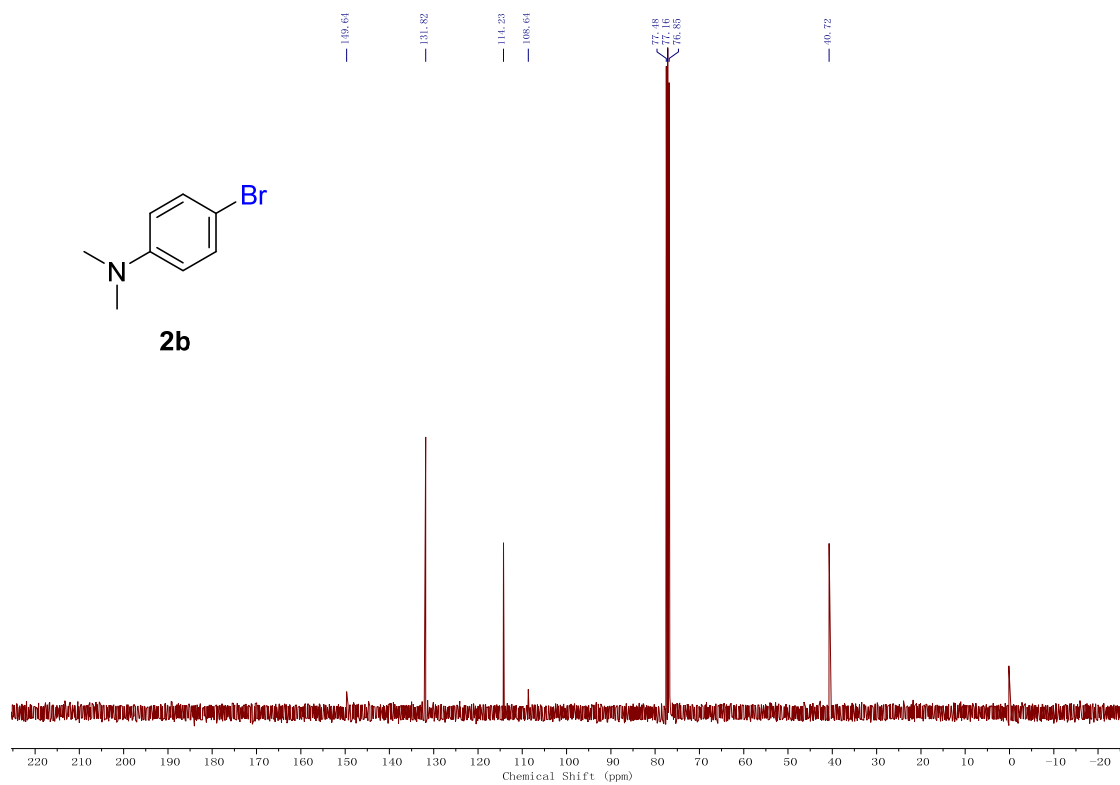

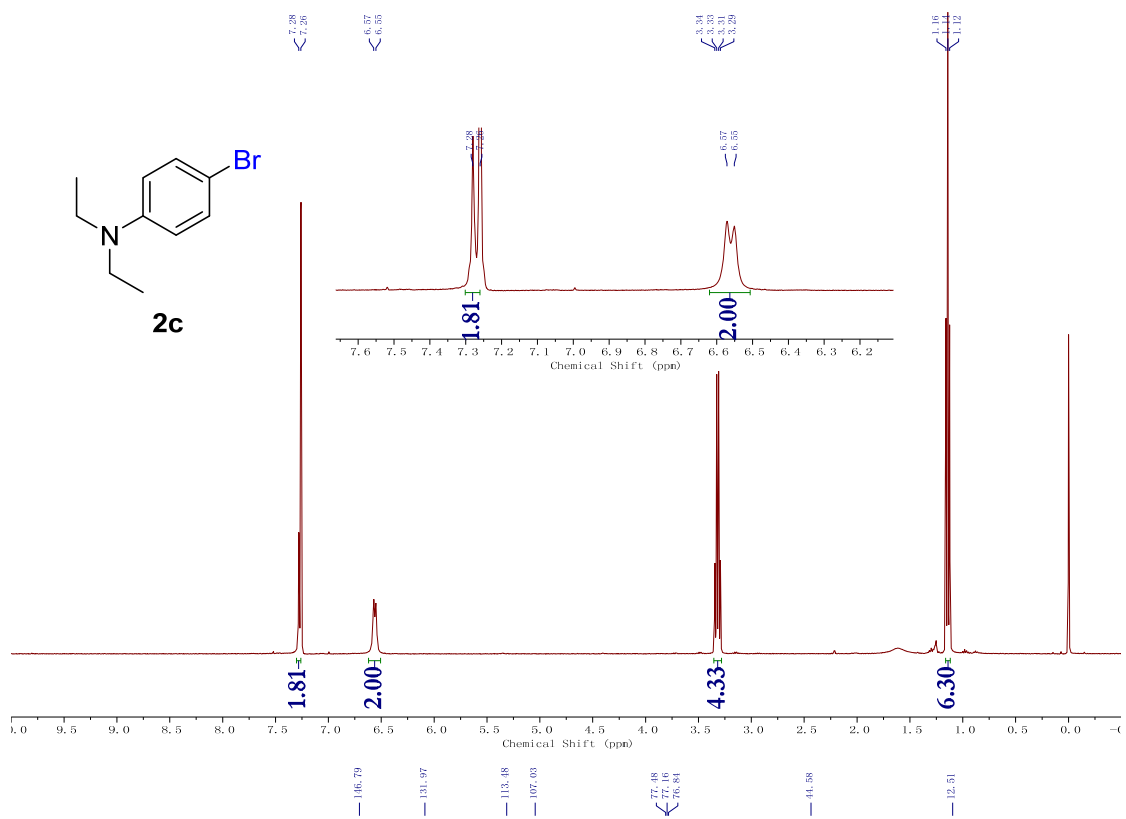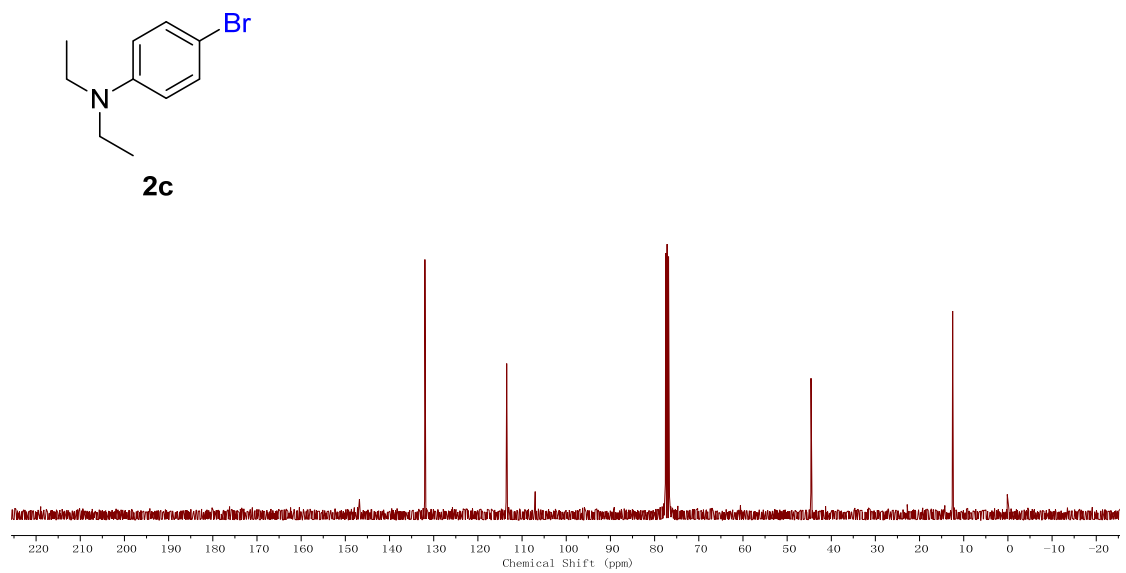

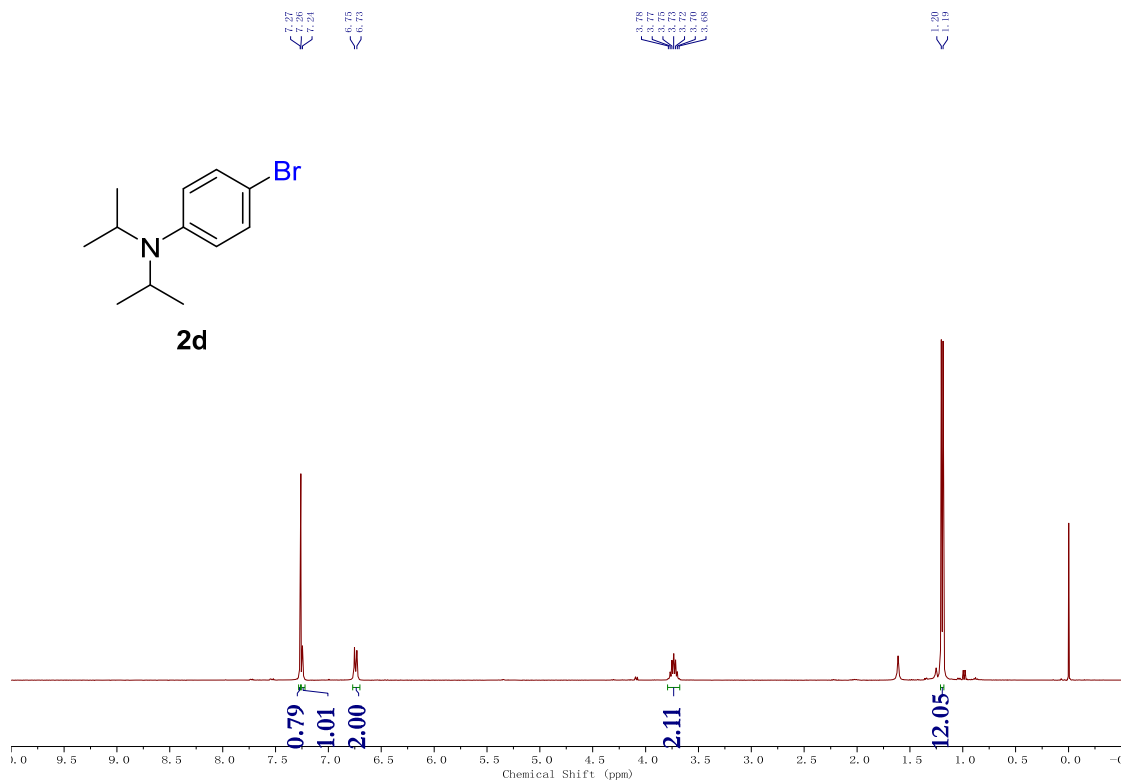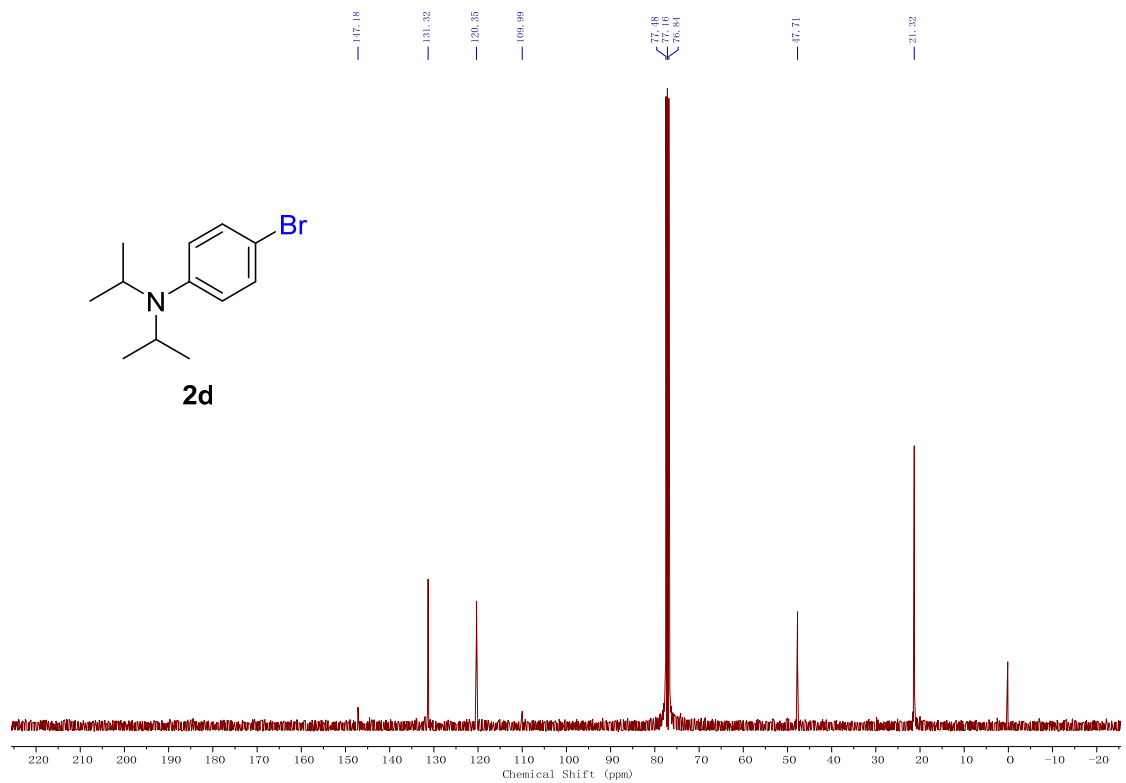

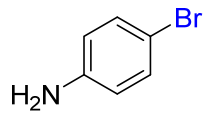

**2e**

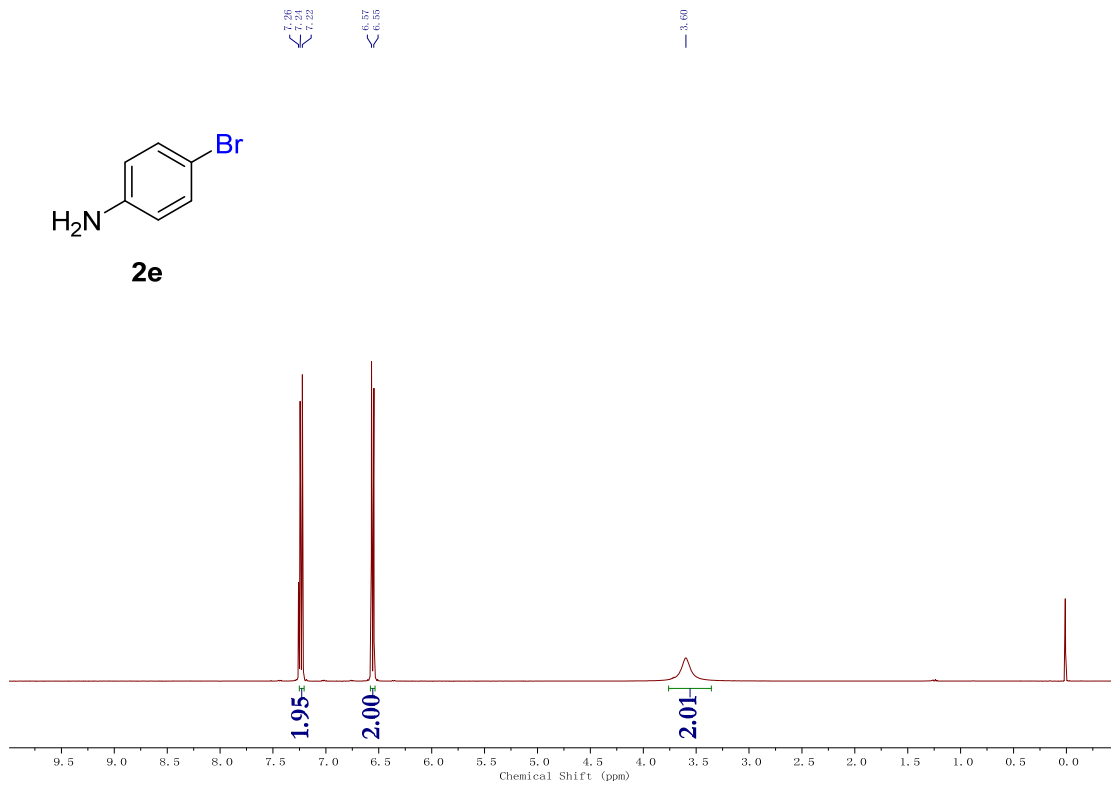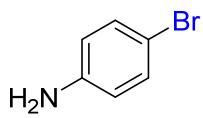

**2e**

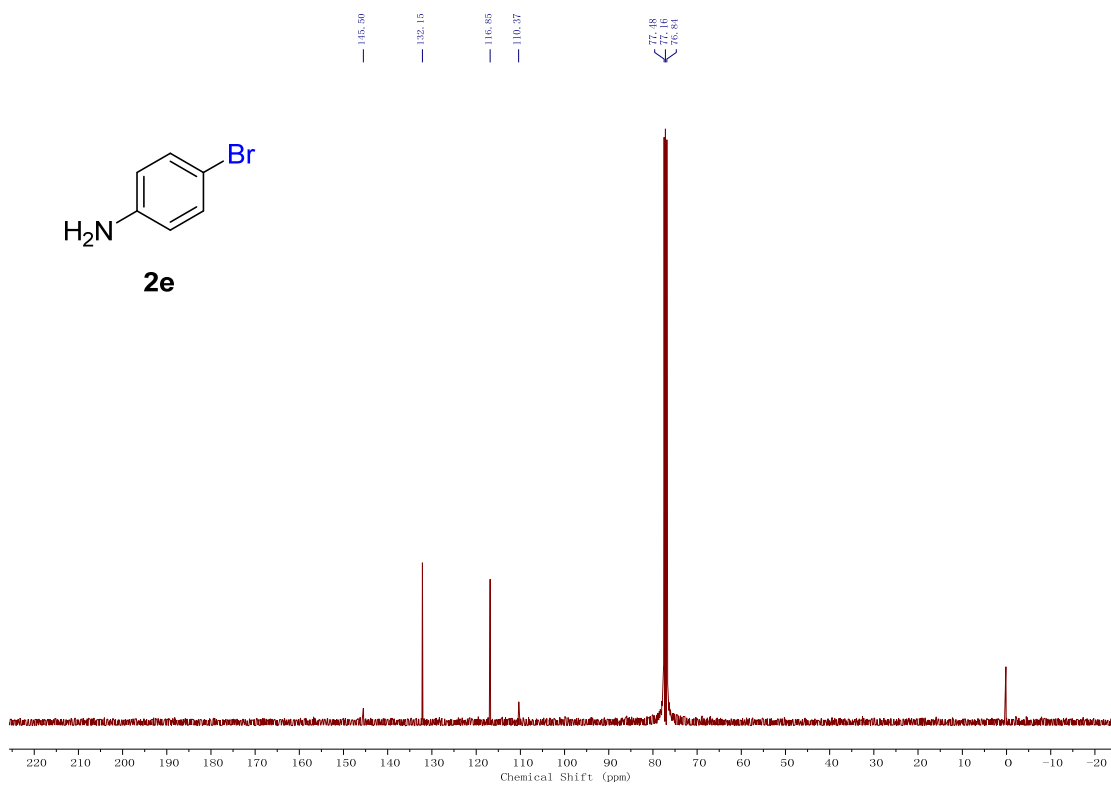

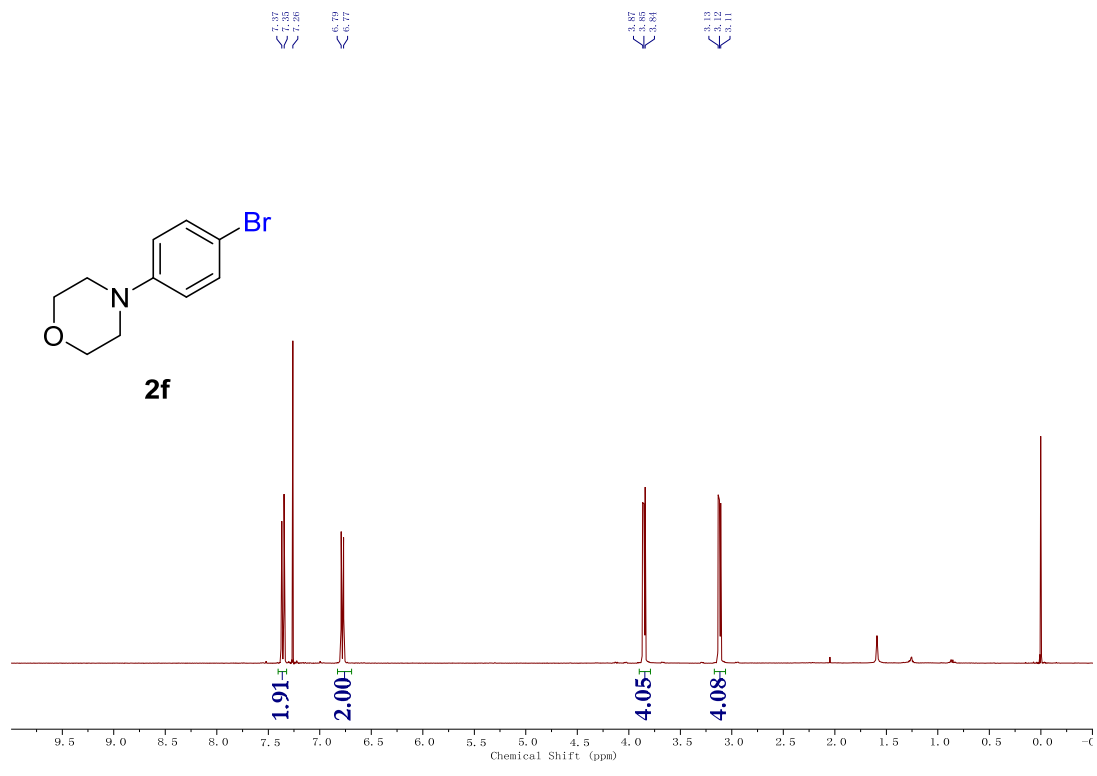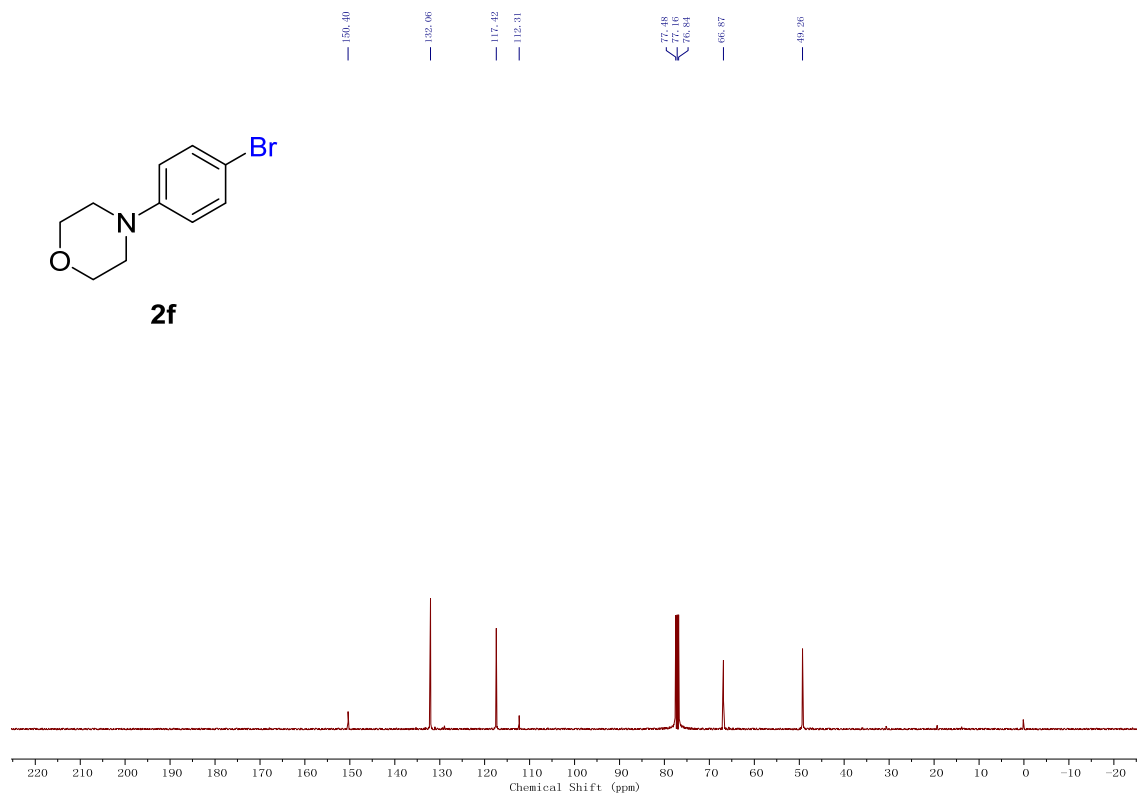

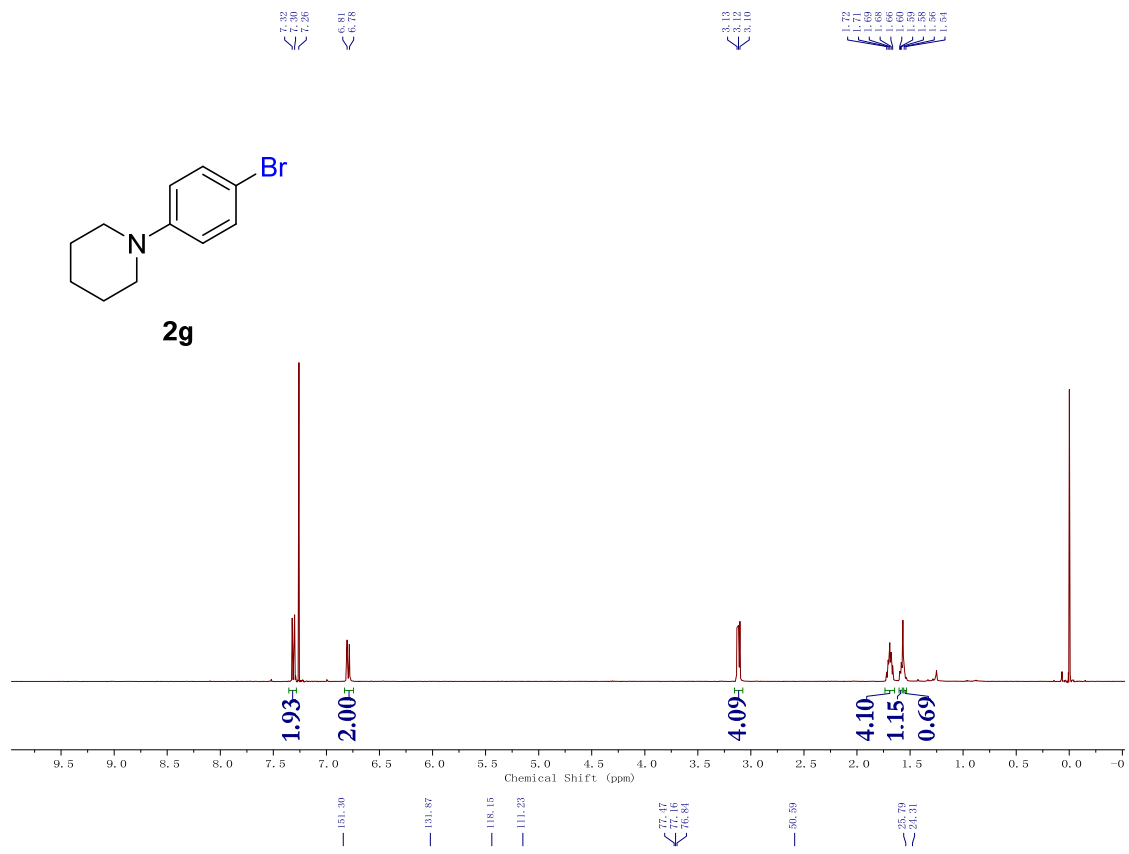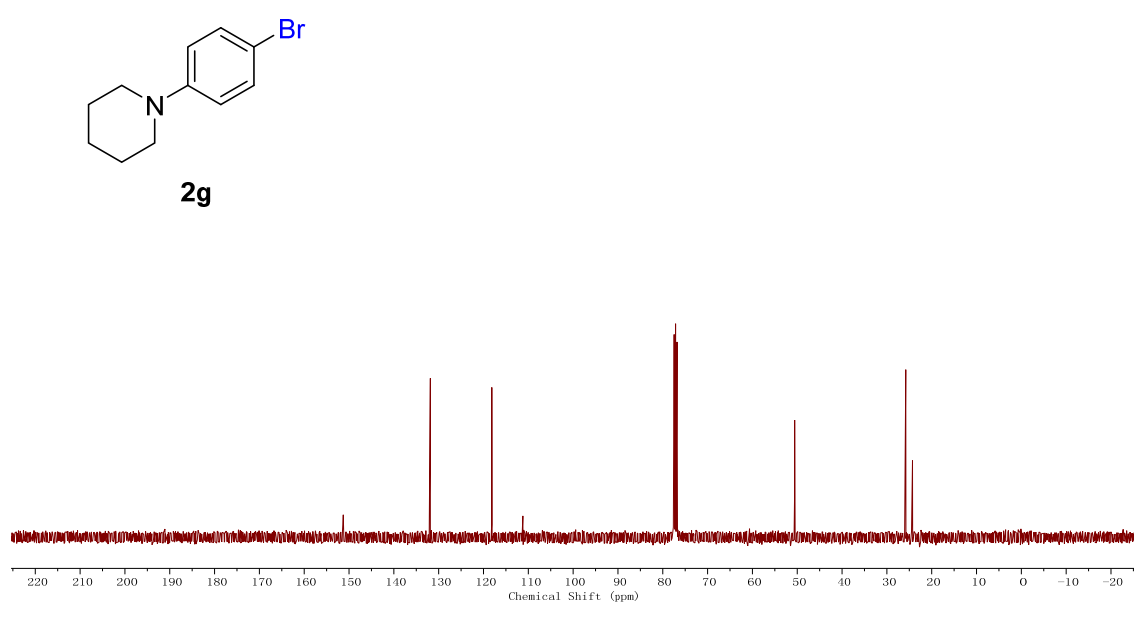

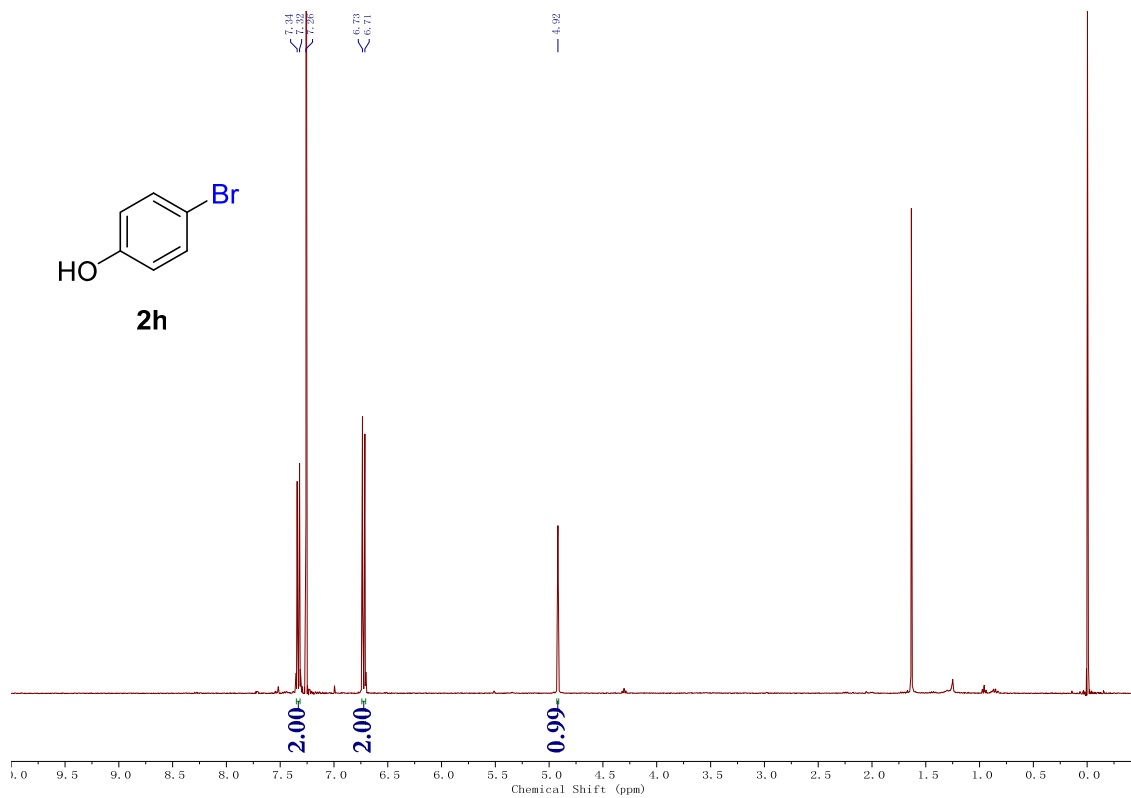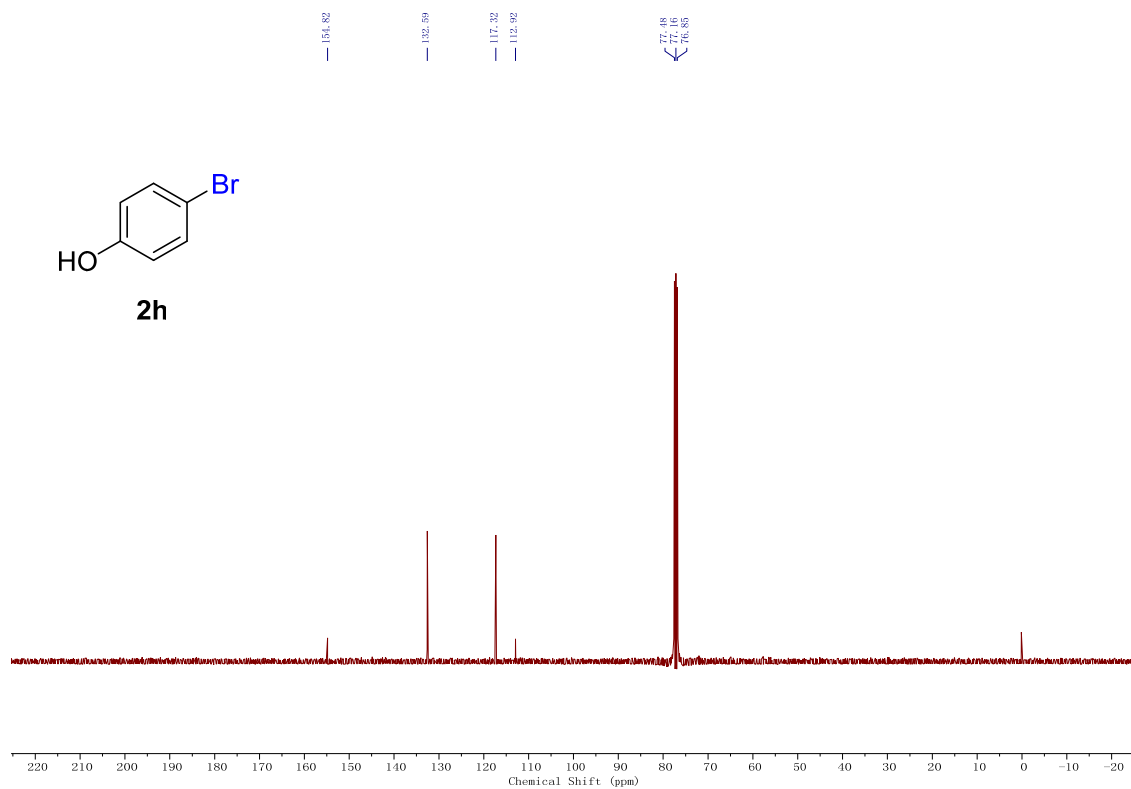



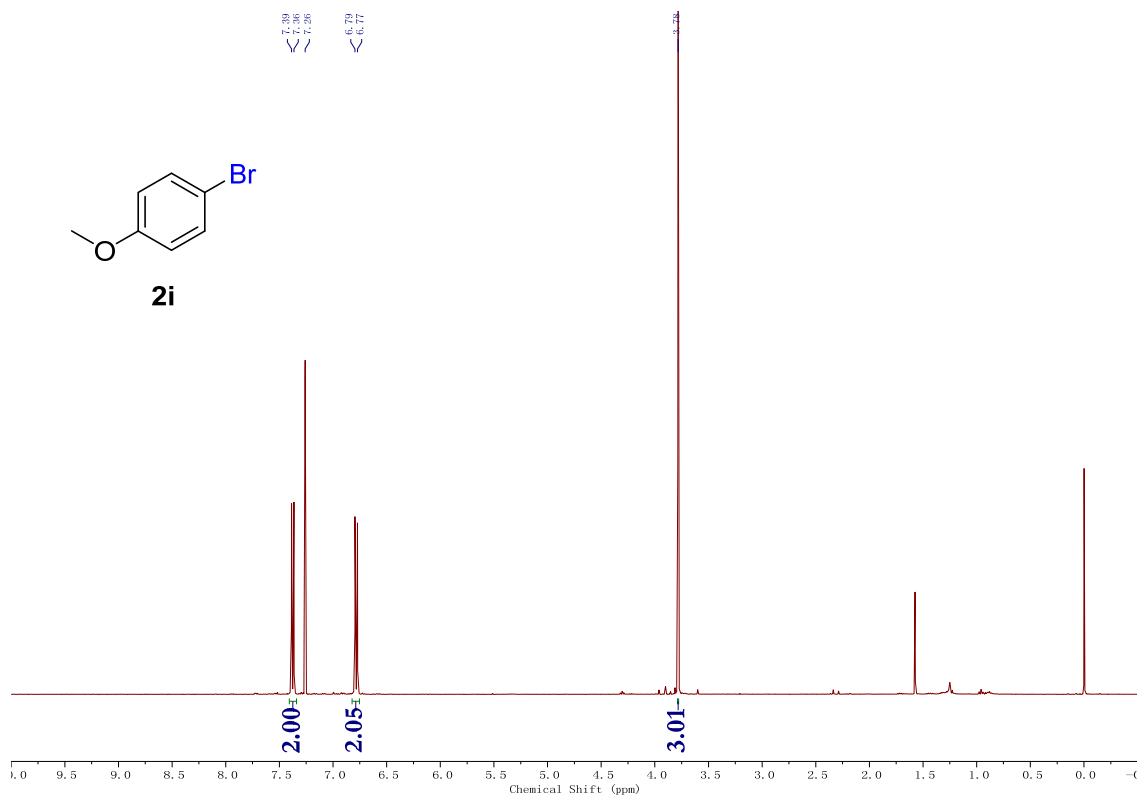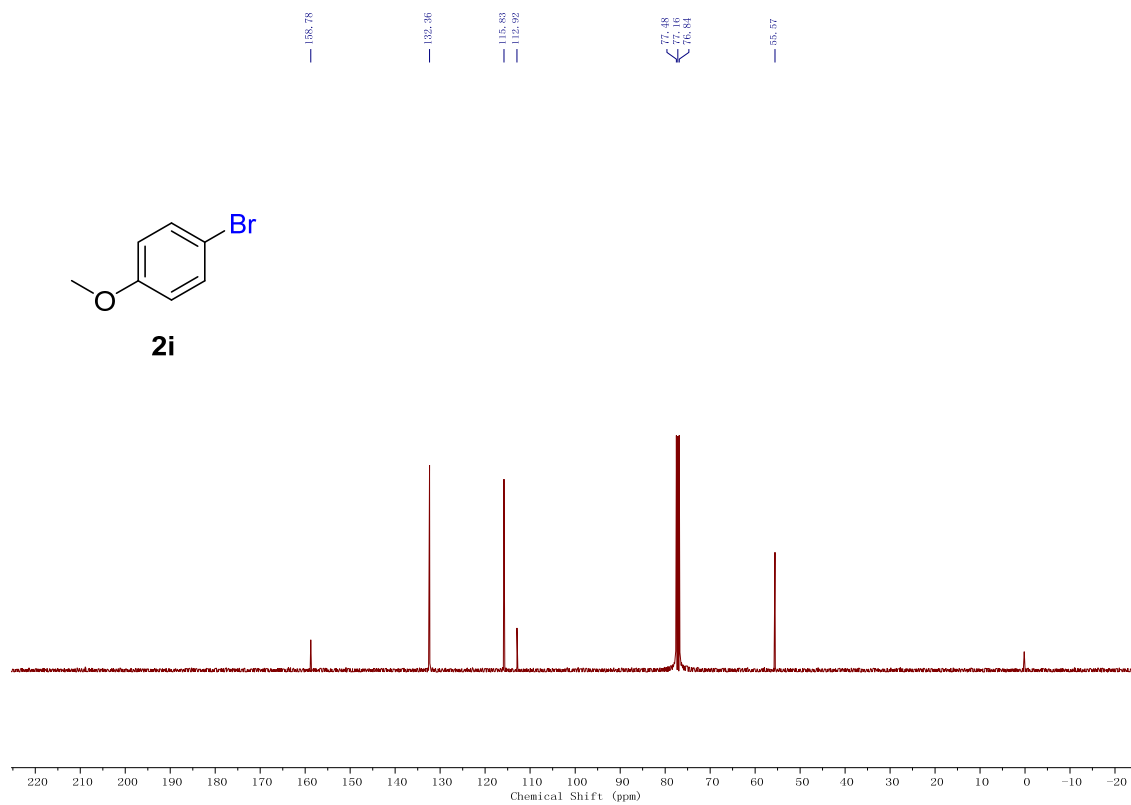

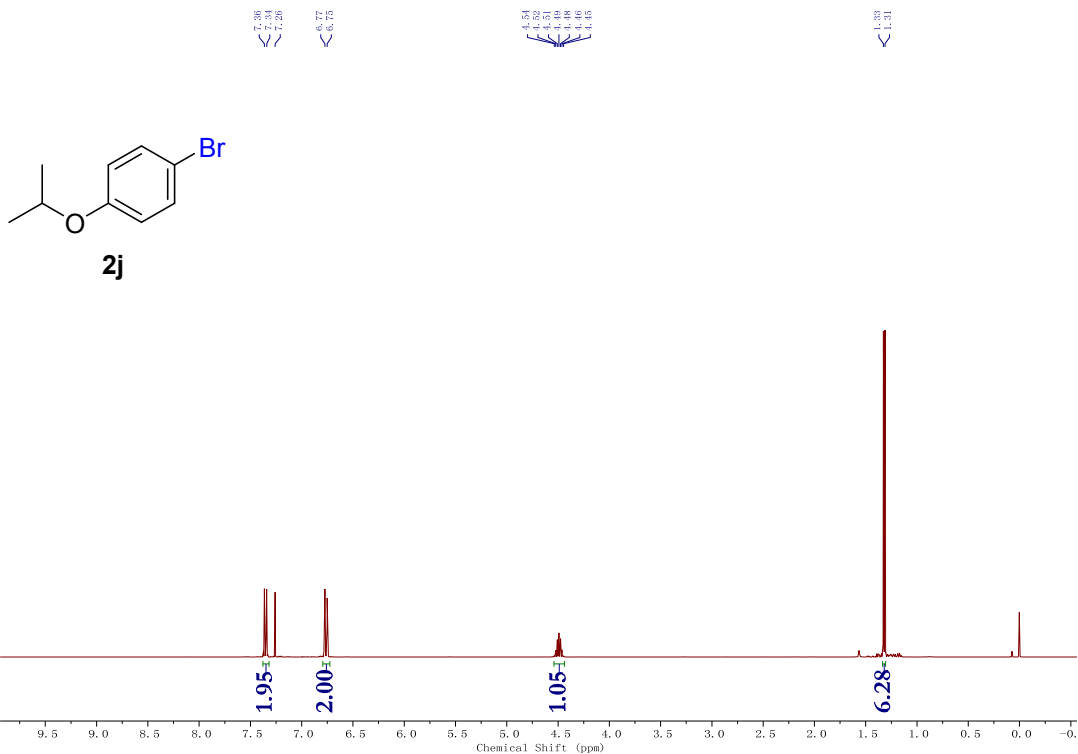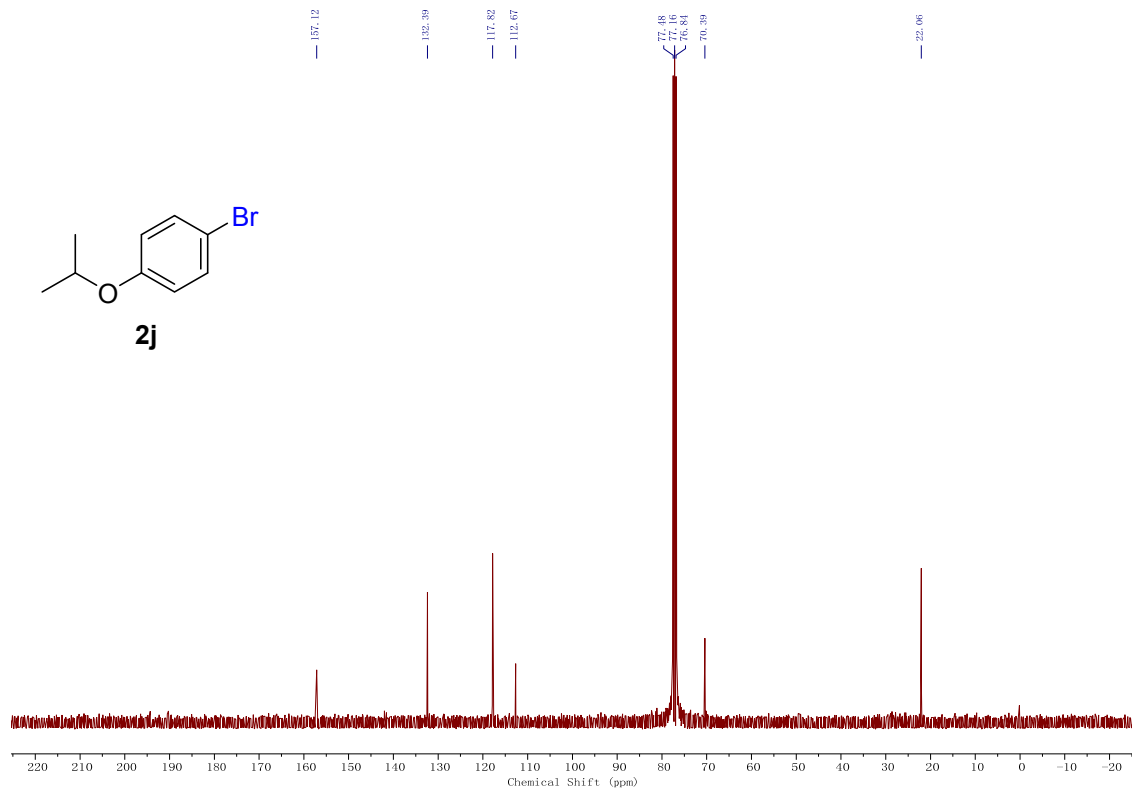

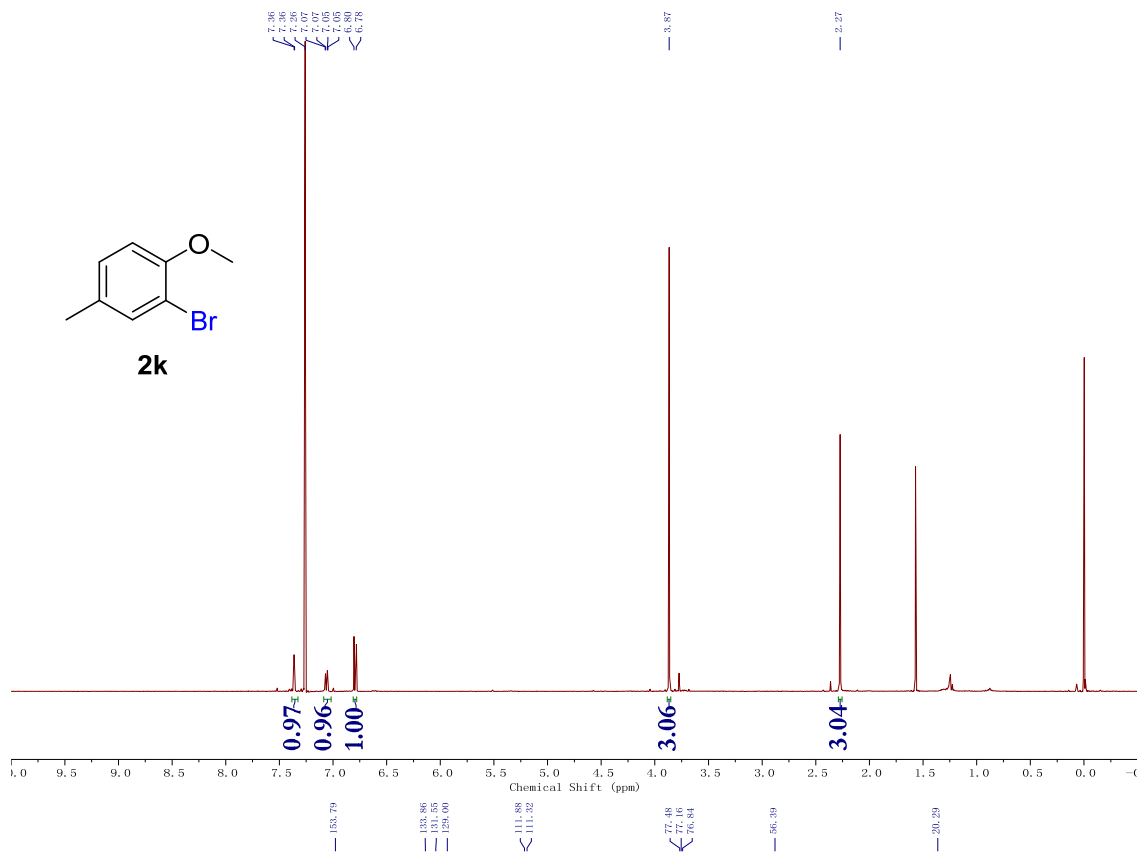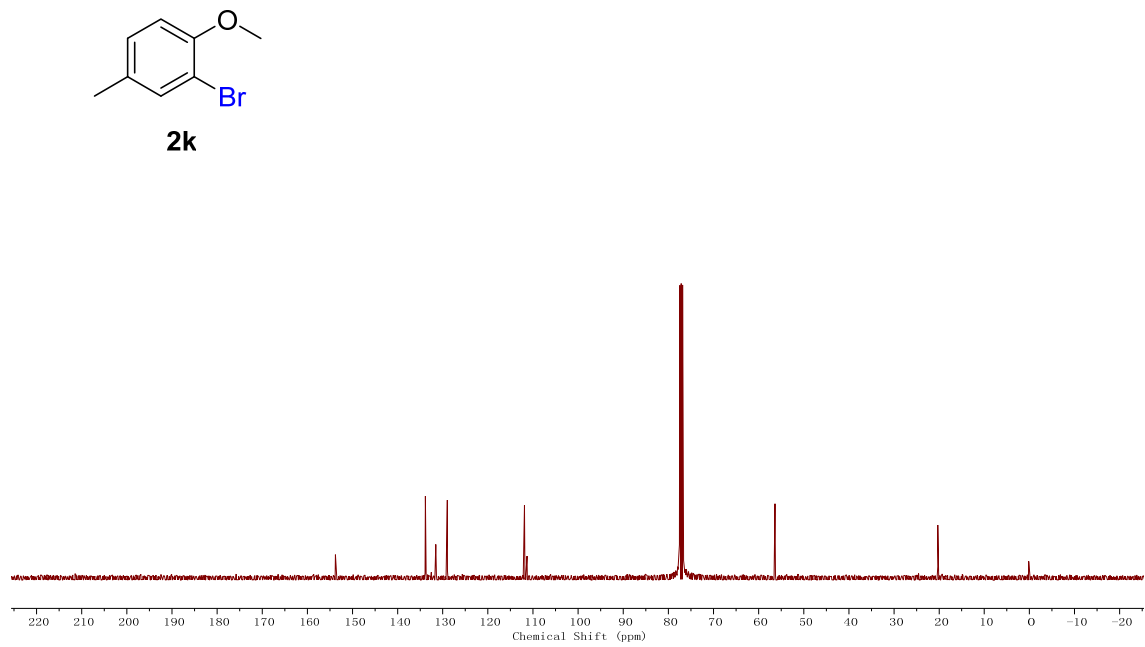



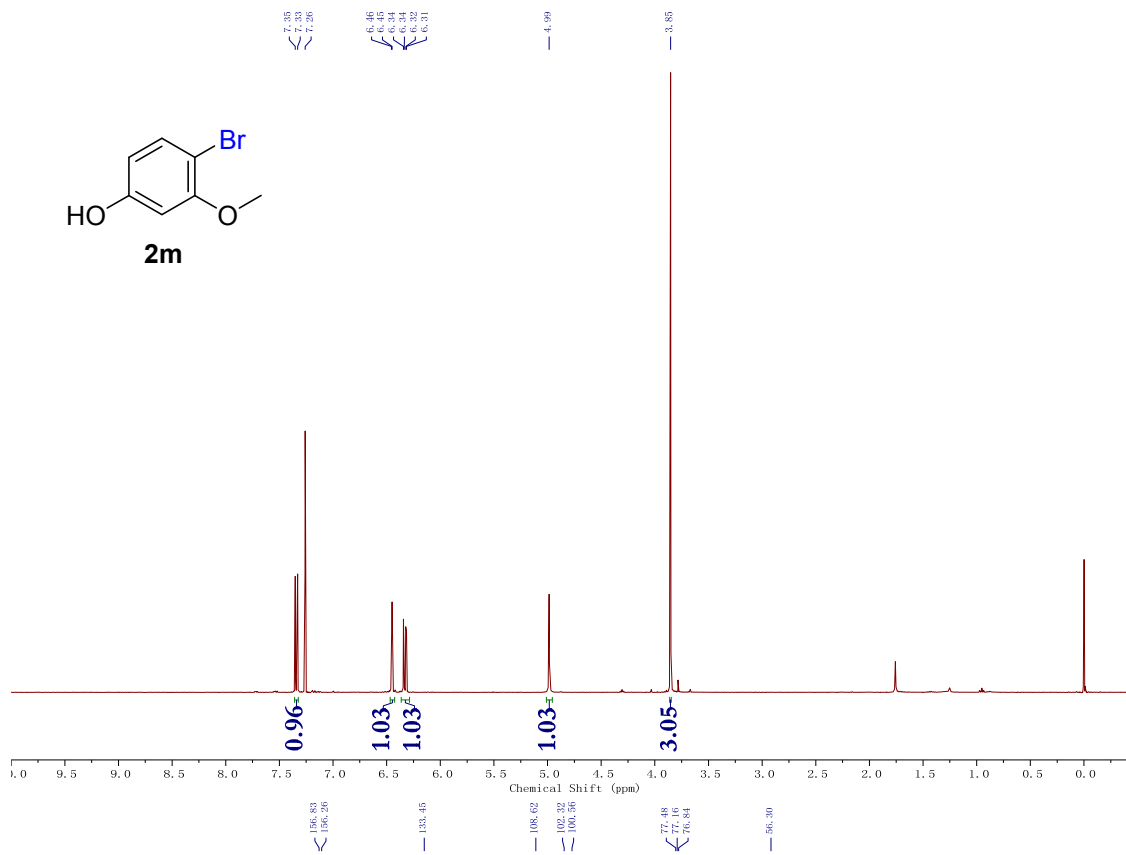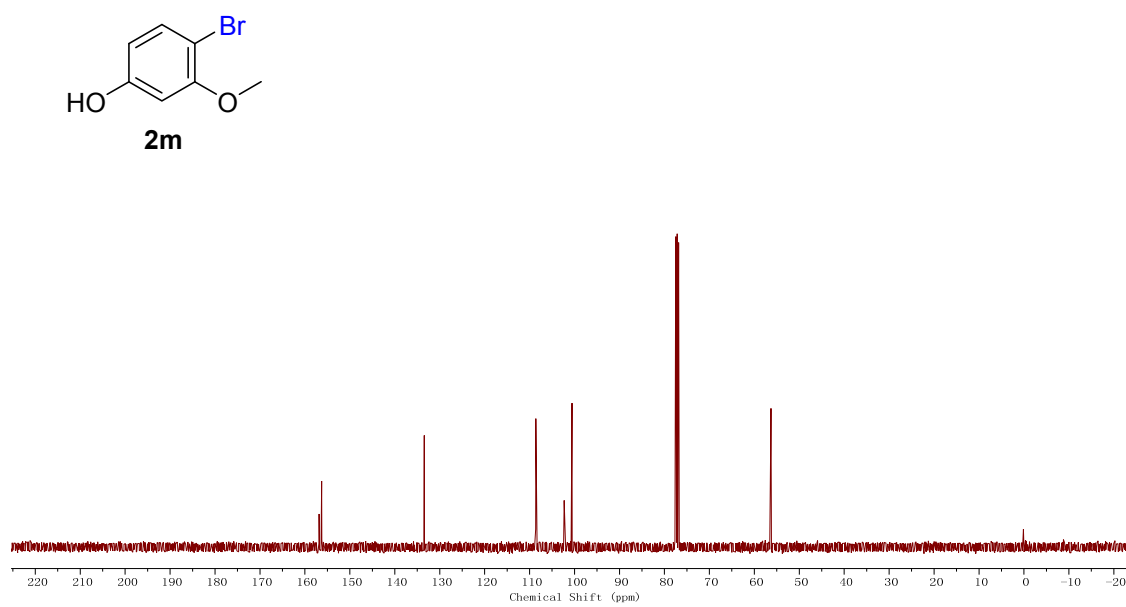

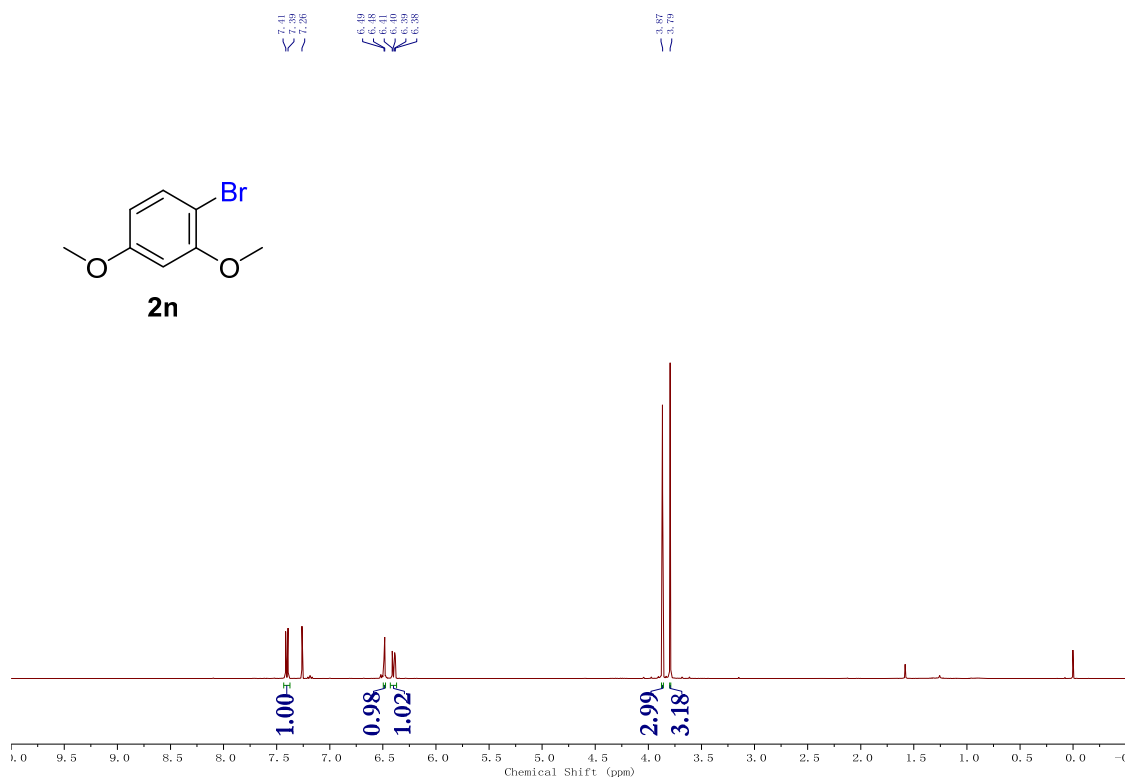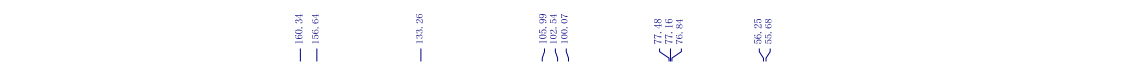

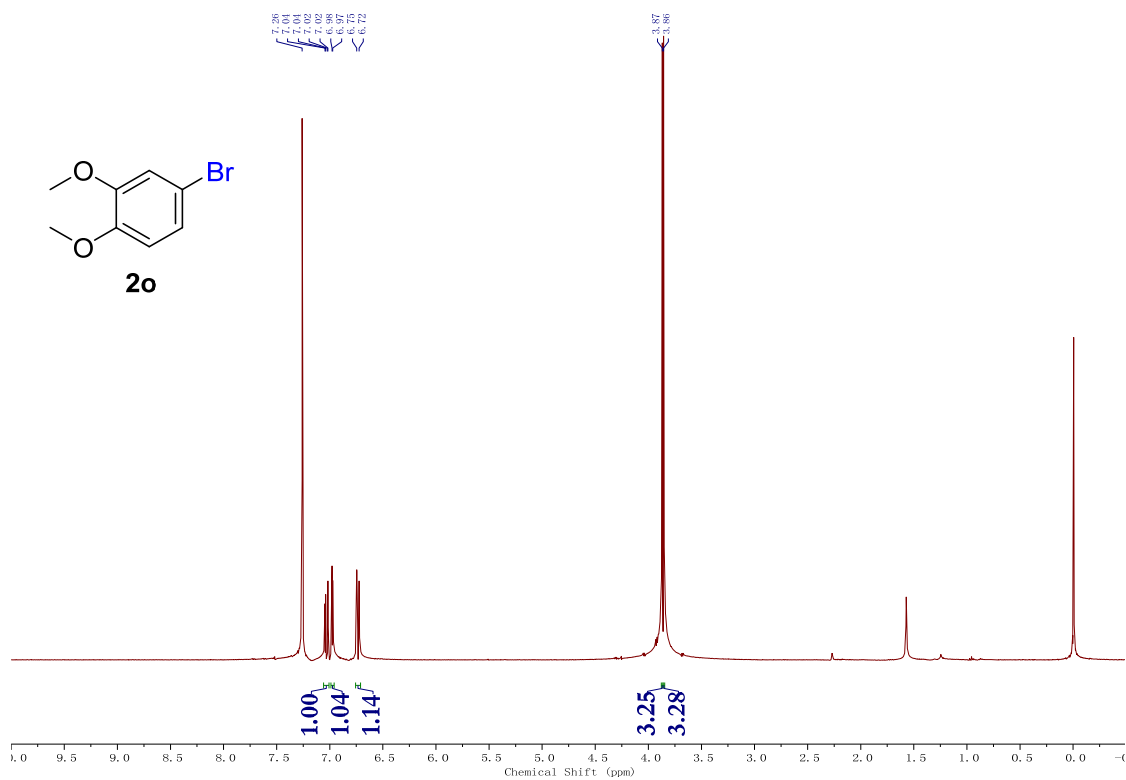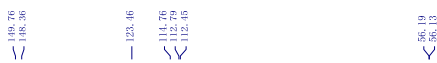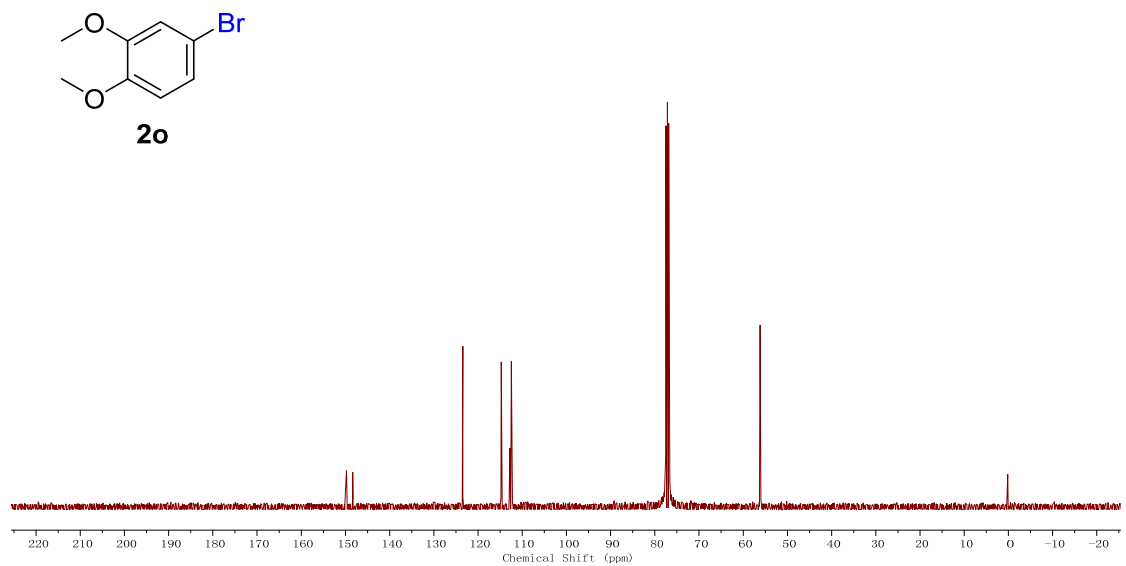

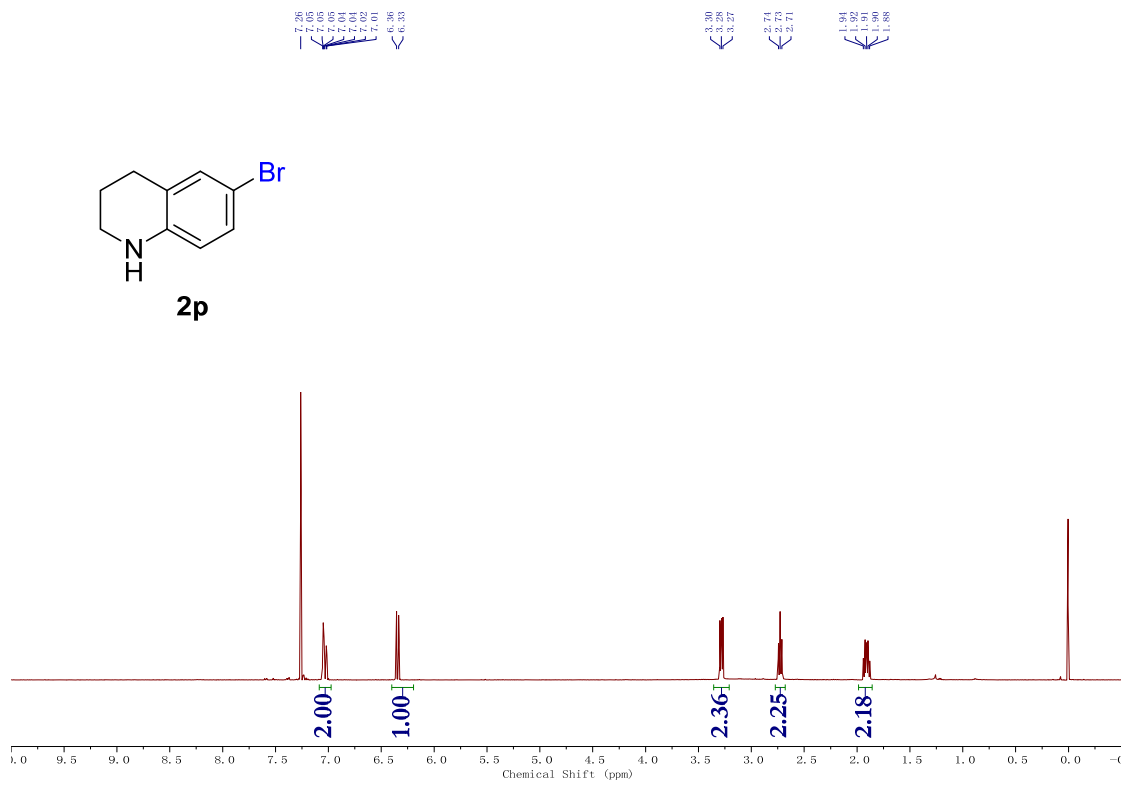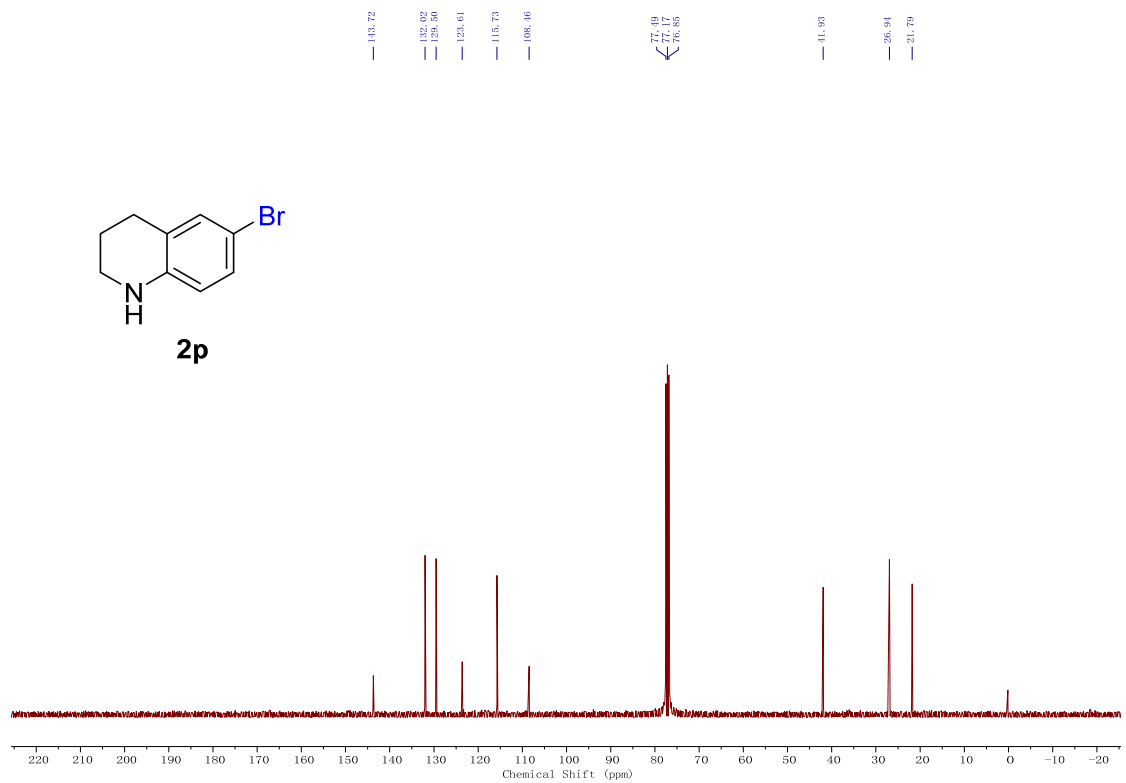



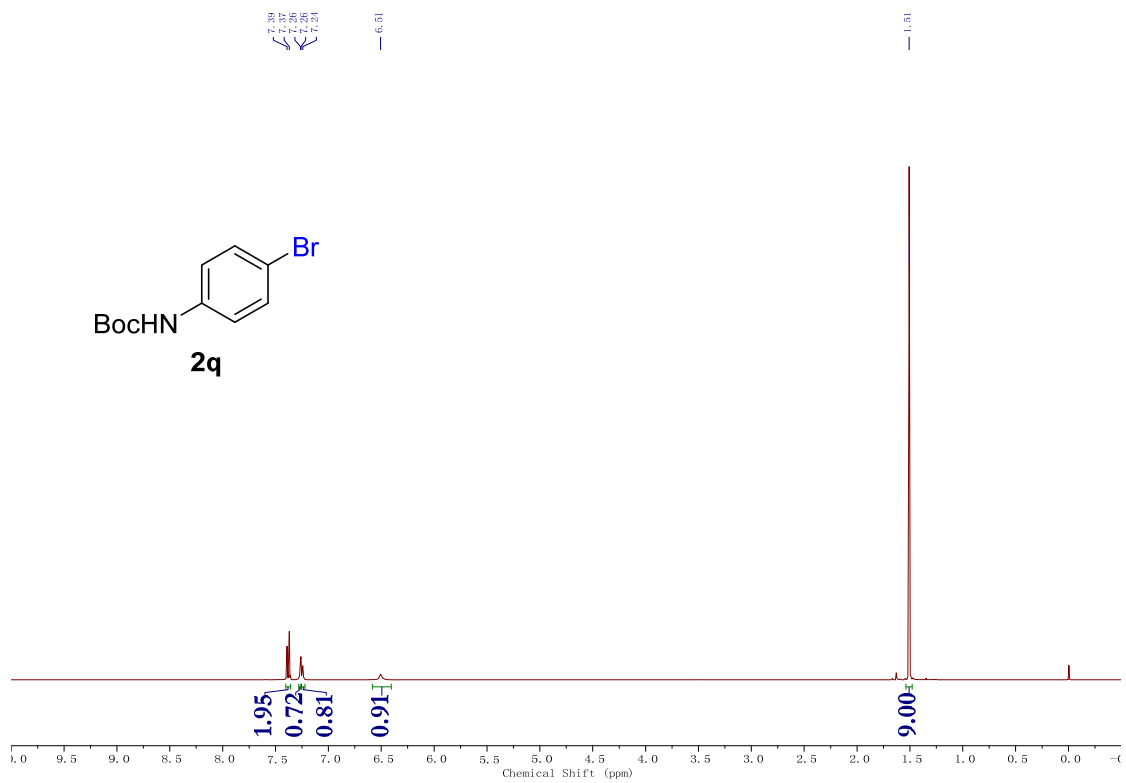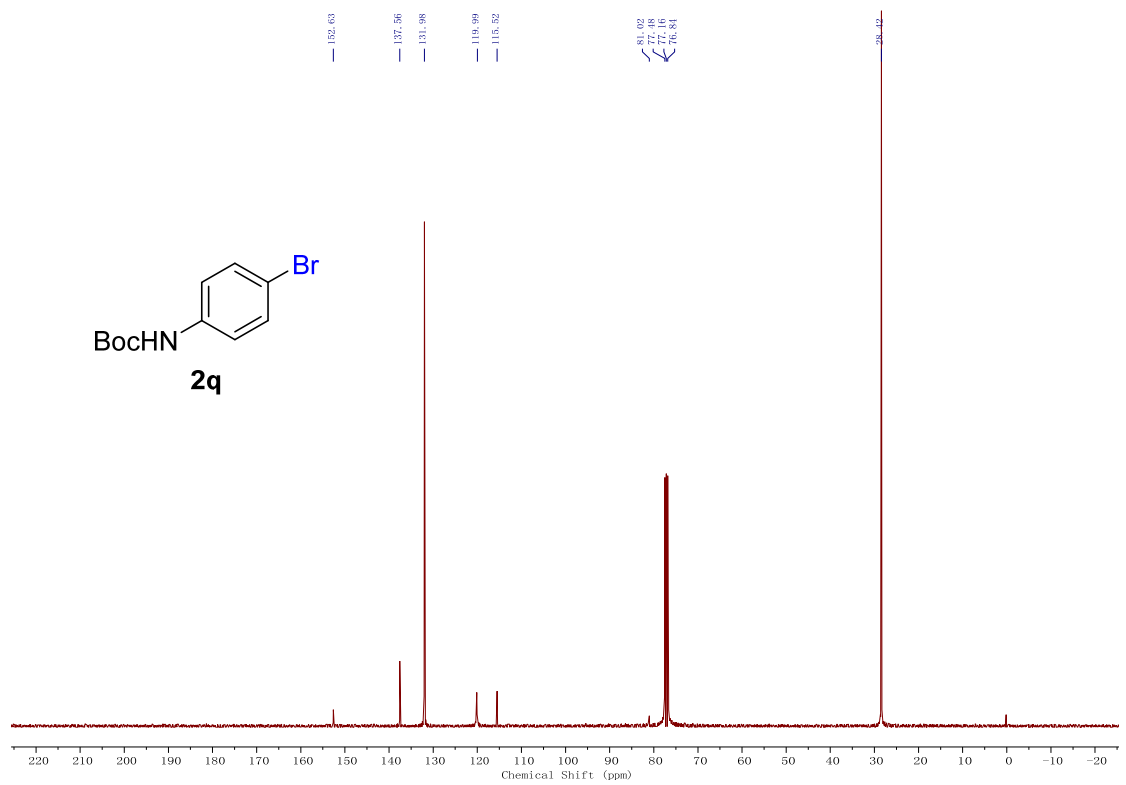

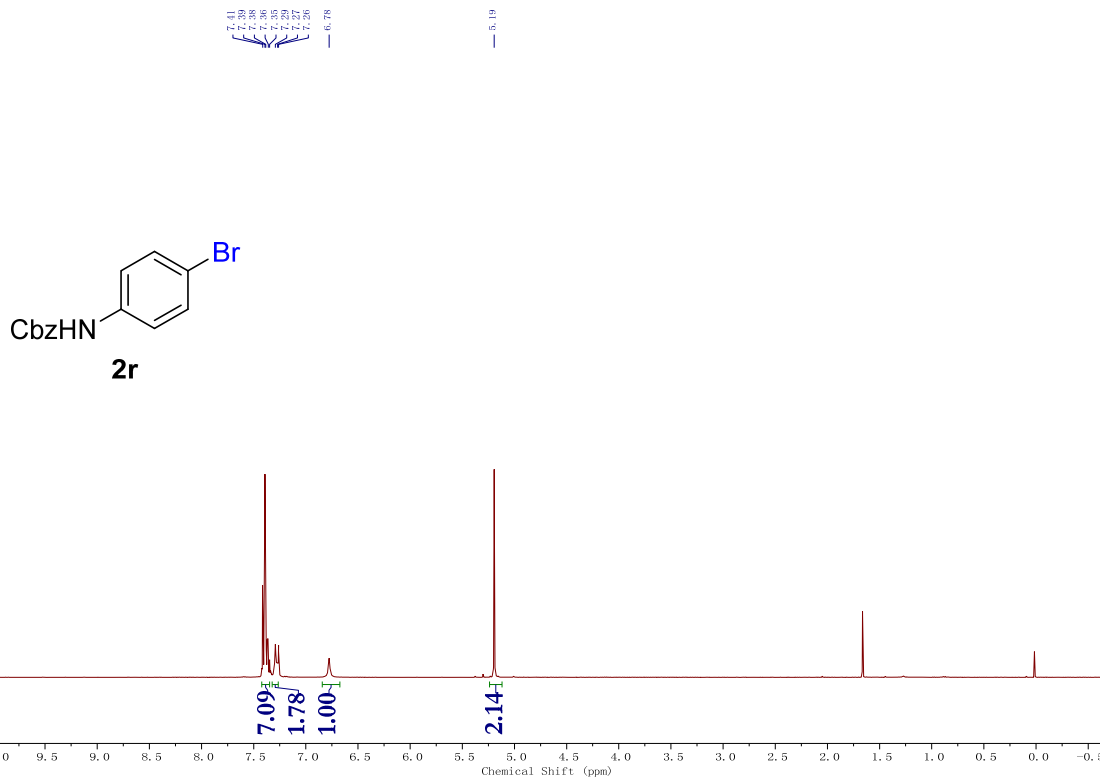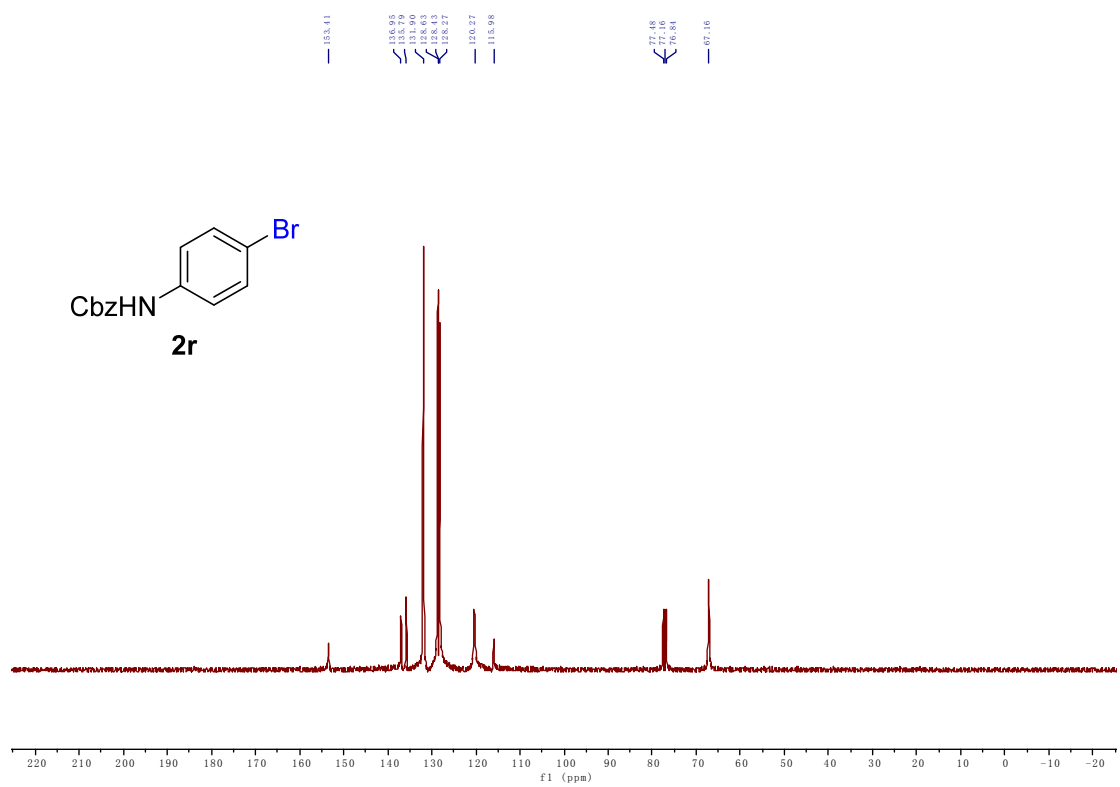

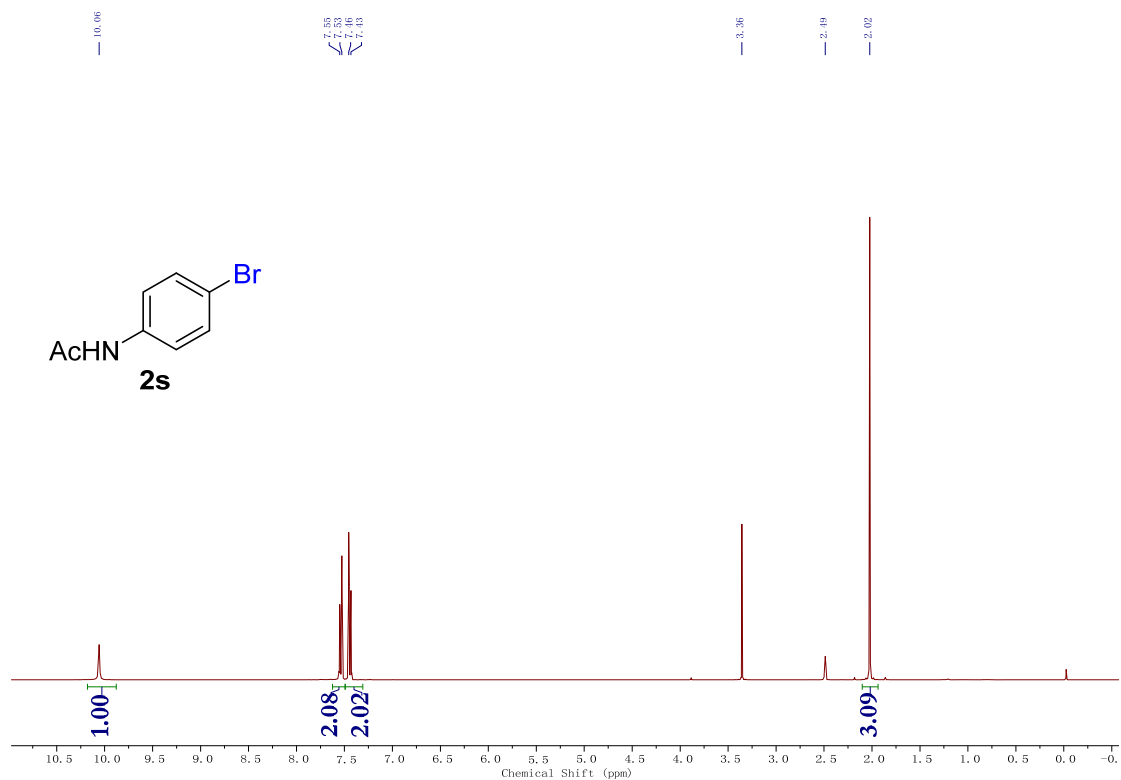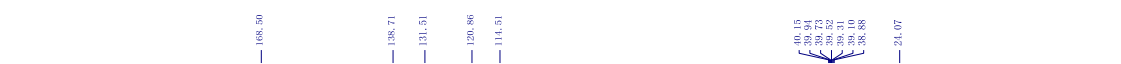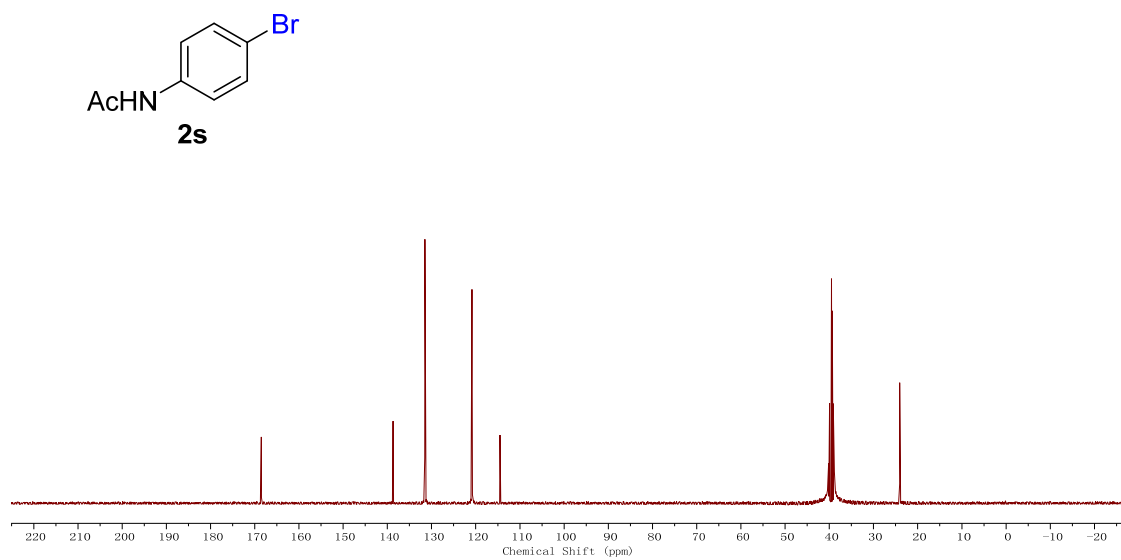

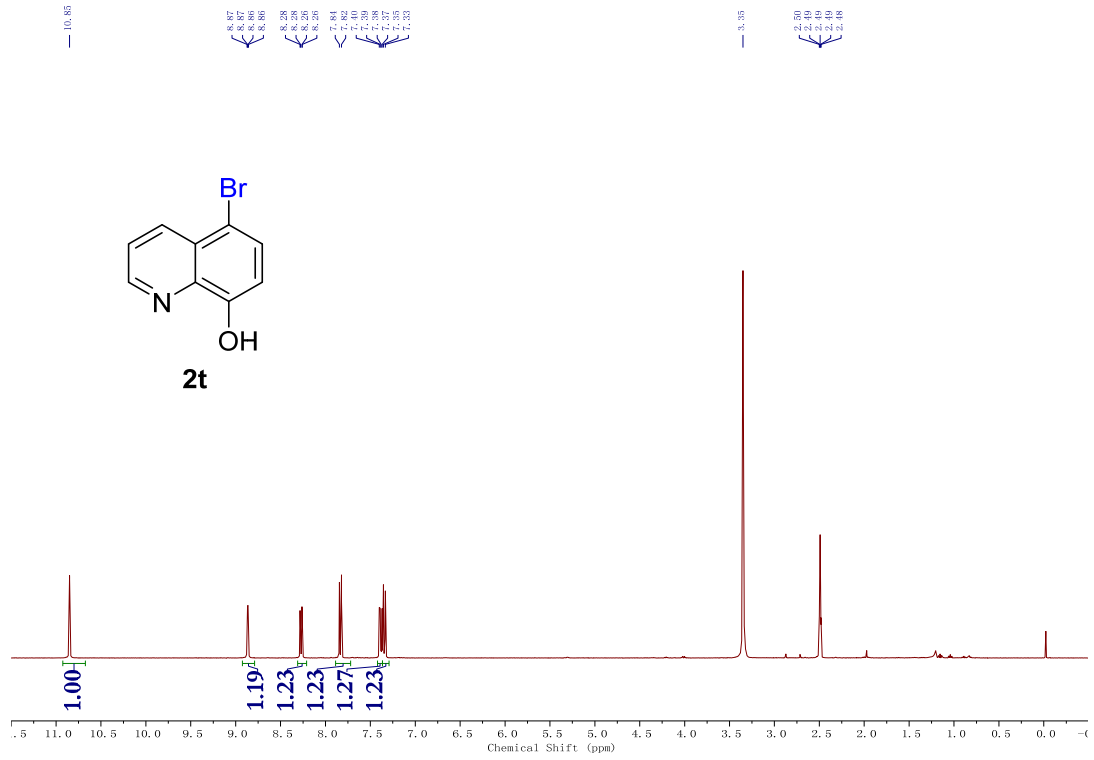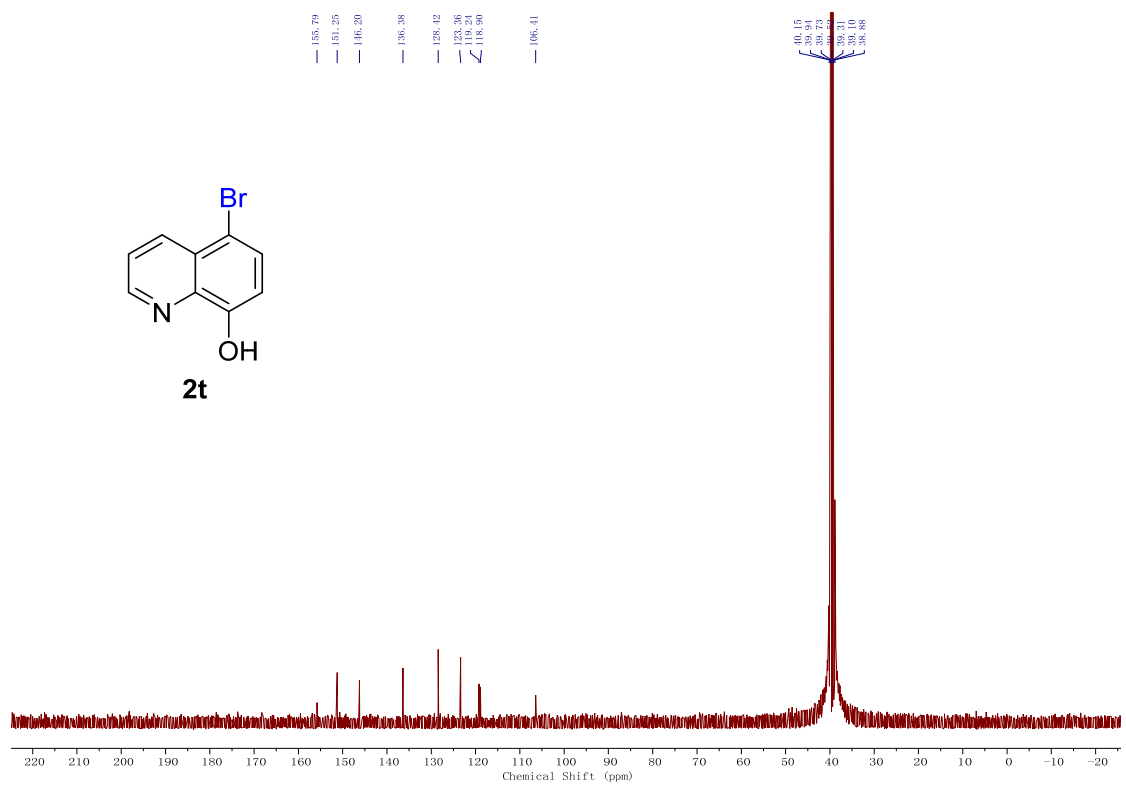

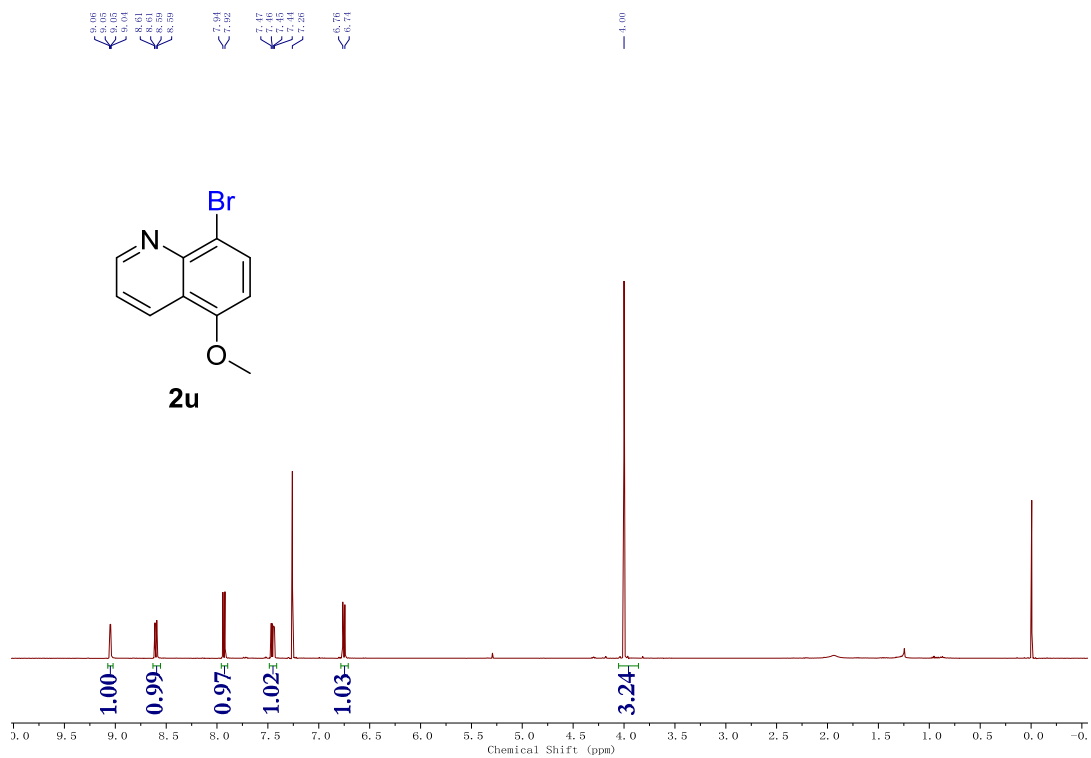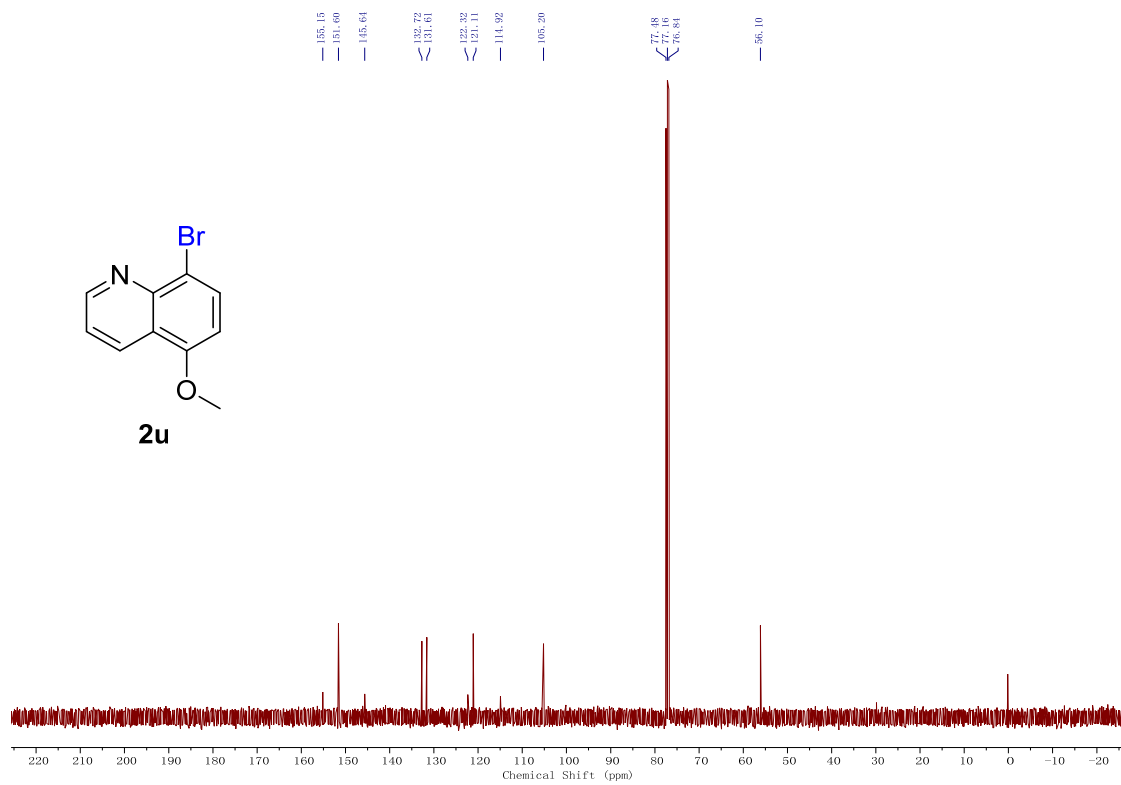

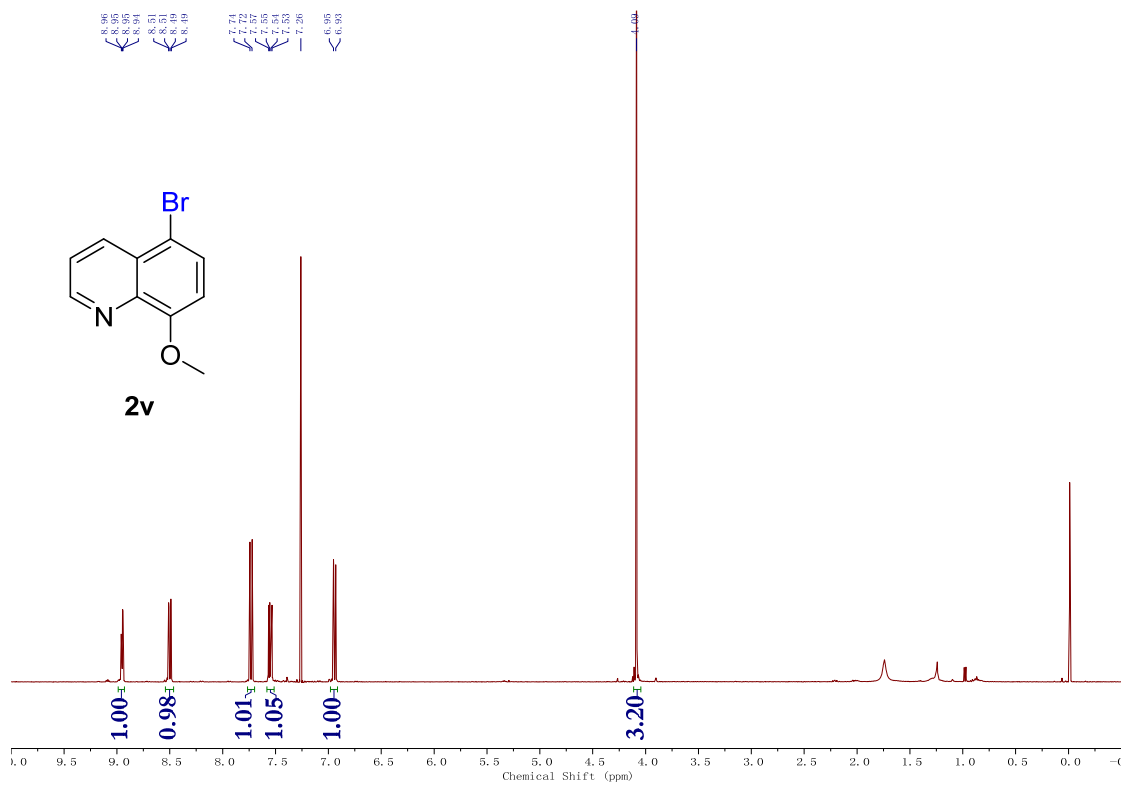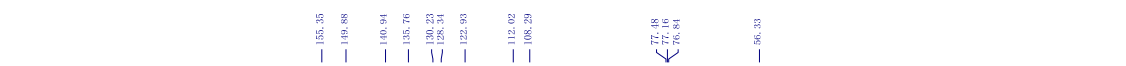



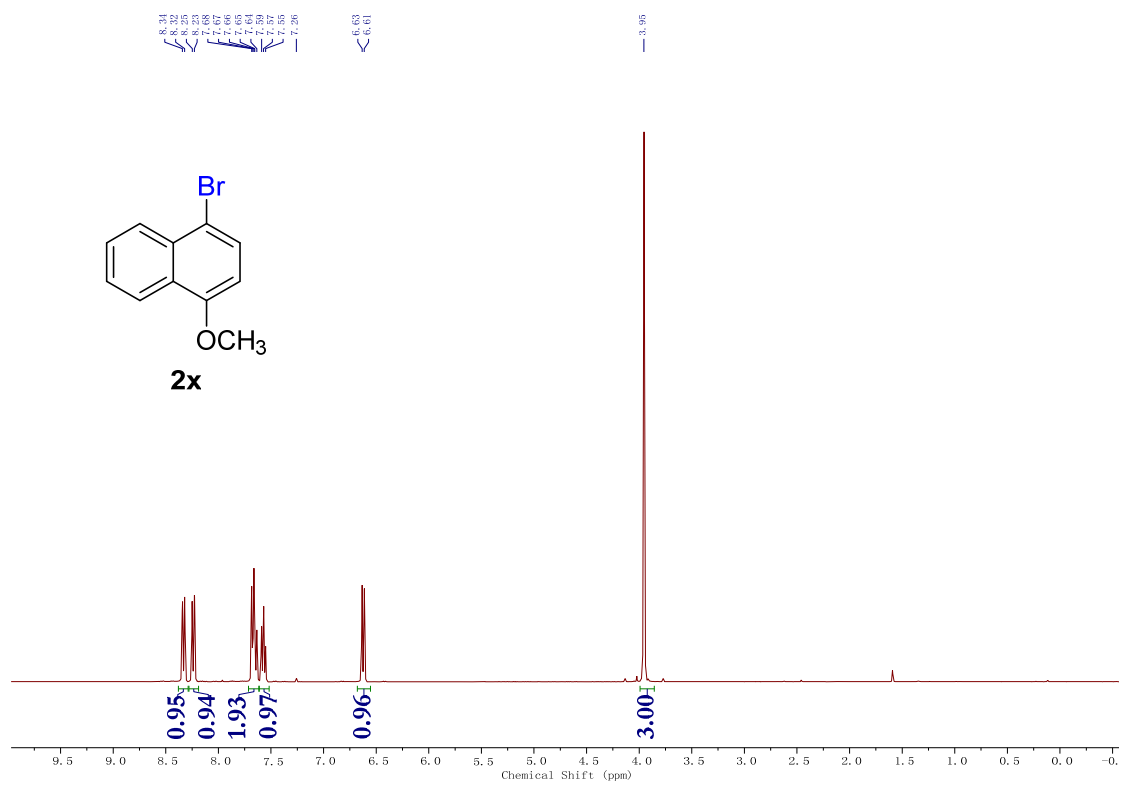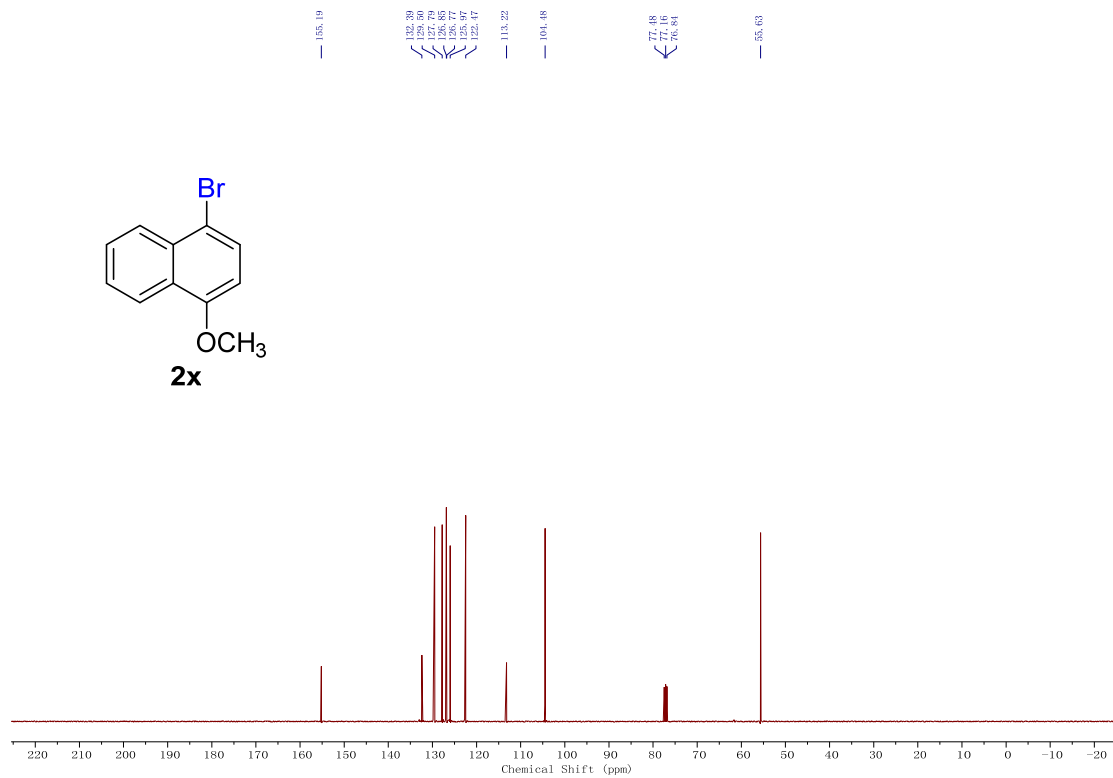



## 5. References

- [1] W. Xie, S. Ning, N. Liu, Y. Bai, S. Wang, S. Wang, L. Shi, X. Che, J. Xiang, *Synlett* **2019**, *30*, 1313.
- [2] Z. Huang, F. Li, B. Chen, T. Lu, Y. Yuan, G. Yuan, *ChemSusChem* **2013**, *6*, 1337.
- [3] Y. Shi, Z. Ke, Y.-Y. Yeung, *Green Chem.* **2018**, *20*, 4448.
- [4] J. Liu, A. O. Burts, Y. Li, A. V. Zhukhovitskiy, M. F. Ottaviani, N. J. Turro, J. A. Johnson, *J. Am. Chem. Soc.* **2012**, *134*, 16337.
- [5] X. Xiong, F. Tan, Y.-Y. Yeung, *Org. Lett.* **2017**, *19*, 4243.
- [6] X. Chen, X. Liu, J. S. Martinez, J. T. Mohr, *Tetrahedron* **2016**, *72*, 3653.
- [7] J. Wu, J. H. Barnard, Y. Zhang, D. Talwar, C. M. Robertson, J. Xiao, *Chem. Commun.* **2013**, *49*, 7052.
- [8] S. Li, R. Khan, X. Zhang, Y. Yang, Z. Wang, Y. Zhan, Y. Dai, Y.-e. Liu, B. Fan, *Org. Biomol. Chem.* **2019**, *17*, 5891.
- [9] F. Trécourt, M. Mallet, F. Mongin, G. Quéguiner, *Synthesis* **1995**, *1995*, 1159.
- [10] X. Yang, Q.-L. Yang, X.-Y. Wang, H.-H. Xu, T.-S. Mei, Y. Huang, P. Fang, *J. Org. Chem.* **2020**, *85*, 3497.
